# Supplementary material for: Benchmarking bulk and single-cell variant-calling approaches on Chromium scRNA-seq and scATAC-seq libraries
Source: HighWire-hosted journal article supplement (doi:10.1101/gr.277066.122), 2024-08-01
Supplement: Supplemental_Code.docx [file Supplemental_Code.docx]

File Structure (Table of Contents)

[variant_stats.py 2](#_Toc173090568)

[R 28](#_Toc173090569)

[cell_cycle.R 28](#_Toc173090570)

[ptm_count.R 31](#_Toc173090571)

[seurat_RNA.R 35](#_Toc173090572)

[seurat_mutations.R 42](#_Toc173090573)

[examples 46](#_Toc173090574)

[wgs_v_rna_sccaller_data.json 46](#_Toc173090575)

[wgs_v_sc_exonic_vaf_filters.json 47](#_Toc173090576)

[wgs_v_sc_non_exonic_filters.json 48](#_Toc173090577)

[scripts 49](#_Toc173090578)

[count_vartrix.py 49](#_Toc173090579)

[split_script.py 52](#_Toc173090580)

[sh 55](#_Toc173090581)

[post_process.sh 55](#_Toc173090582)

[run_sccaller.sh 56](#_Toc173090583)

[run_snpeff.sh 57](#_Toc173090584)

[run_strelka.sh 58](#_Toc173090585)

[run_vartrix.sh 59](#_Toc173090586)

[split_bam_cells.sh 60](#_Toc173090587)

[src 61](#_Toc173090588)

[cell_list.py 61](#_Toc173090589)

[count_ase_reader.py 66](#_Toc173090590)

[count_vartrix.py 67](#_Toc173090591)

[filtering.py 70](#_Toc173090592)

[mutation_signature.py 72](#_Toc173090593)

[overlap_mutation_list.py 74](#_Toc173090594)

[parsed_mutation_list.py 77](#_Toc173090595)

[parsed_vcf.py 82](#_Toc173090596)

[plot.py 88](#_Toc173090597)

[ptm.py 89](#_Toc173090598)

[stats.py 90](#_Toc173090599)

[utils.py 92](#_Toc173090600)

# variant_stats.py

import os

import sys

import pandas as pd

import json

import argparse

import copy

pd.set_option('display.max_columns', None)

from src.count_vartrix import count_vartrix

from src.count_ase_reader import count_ase_reader

#pd.options.mode.chained_assignment = None # default='warn'

from src.parsed_vcf import ParsedVCF

from src.cell_list import CellList, get_cell_lists

from src.parsed_mutation_list import ParsedMutationList, get_mutations, save_mutation_array, load_mutation_array, generate_vcf

from src.filtering import filter_mutations

from src.overlap_mutation_list import OverlapMutationList, common_variants, redo_common, rank_overlap

### TEST SCRIPTS ###

def filter_single(infile, outfile, outvcf = None, save_intermediary = None, min_qual = -1.0, exonic=False, splice=False):

print("Parsing vcf...")

vcf_parsed = ParsedVCF(infile)

vcf_parsed_as_list = [vcf_parsed]

# TODO change cell list so that it may process single vcf without list hassle

print("Compiling variants...")

vcf_as_cell_list = CellList(vcf_parsed_as_list, "single_vcf")

vcf_as_mutation_list = ParsedMutationList(vcf_as_cell_list)

if save_intermediary:

save_mutation_array(vcf_as_mutation_list, save_intermediary)

# May wish to add additional options here such as Pass or scVAF

print("Filtering variants...")

filtered = filter_mutations(vcf_as_mutation_list, 0.0, 0, 0.0, 0, min_qual, exonic=exonic, splice=splice)[0]

print("Saving variants...")

filtered.parsed_mutations.to_csv(outfile, sep='\t', index=False)

if outvcf:

generate_vcf(filtered.parsed_mutations, filtered[0], outvcf)

def filter_and_overlap_multiple(sample_list, outfile, outvcf = None, save_intermediary = None, min_qual = -1.0):

mutation_lists = []

for sample in sample_list:

vcf_parsed = ParsedVCF(sample['file'])

vcf_as_cell_list = CellList([vcf_parsed], sample['name'])

vcf_as_mutation_list = ParsedMutationList(vcf_as_cell_list)

mutation_lists.append(vcf_as_mutation_list)

if save_intermediary:

save_mutation_array(mutation_lists, save_intermediary)

filtered = filter_mutations(mutation_lists, 0.0, 0, 0.0, 0, min_qual, exonic=True, splice=False)

overlap_list = OverlapMutationList(filtered)

common = common_variants(overlap_list, filtered)

common.to_csv(outfile, sep='\t', index=False)

if outvcf:

generate_vcf(common, filtered[0], outvcf)

def extract_scu_variants(lists_WGS, names_WGS, lists_CTRL, names_CTRL, lists_sc, names_sc, out_path, resume=False, min_cells_w_alt_count=0.0, min_alt_read_count=0, min_cell_vaf_factor=0.0, min_sc_qual=0.0, max_alt_read_count=None, max_cells_w_alt_count=None, min_vaf_for_sc_FN_class=0.01):

if not resume:

cells_WGS = get_cell_lists(lists_WGS, names_WGS)

cell_CTRL = get_cell_lists(lists_CTRL, names_CTRL)

cells_sc = get_cell_lists(lists_sc, names_sc)

mutations_WGS = get_mutations(cells_WGS)

mutations_CTRL = get_mutations(cell_CTRL)

mutations_sc = get_mutations(cells_sc)

if not os.path.exists(out_path):

os.mkdir(out_path)

save_mutation_array(mutations_WGS, out_path + "/WGS_intermediaries")

save_mutation_array(mutations_CTRL, out_path + "/CTRL_intermediaries")

save_mutation_array(mutations_sc, out_path + "/sc_intermediaries")

else:

mutations_WGS = load_mutation_array(out_path + "/WGS_intermediaries", names_WGS)

mutations_CTRL = load_mutation_array(out_path + "/CTRL_intermediaries", names_CTRL)

mutations_sc = load_mutation_array(out_path + "sc_intermediaries", names_sc)

filtered_WGS = filter_mutations(mutations_WGS, 0.0, 0, 0.0, 0, 0.0, exonic=False, limexonic=True)

filtered_CTRL = filter_mutations(mutations_CTRL, 0.0, 0, 0.0, 0, 10.0, exonic=False, limexonic=True)

filtered_sc = filter_mutations(mutations_sc, min_cells_w_alt_count, min_alt_read_count, min_cell_vaf_factor, 0, min_sc_qual, max_cell_filter_=max_cells_w_alt_count, max_alt_read_filter_=max_alt_read_count, exonic=False, limexonic=True)

filtered = filtered_sc + filtered_WGS + filtered_CTRL

overlap_list = OverlapMutationList(filtered)

common = common_variants(overlap_list, filtered)

in_WGS = common[names_WGS[0]]

for name in names_WGS[1:]:

in_WGS = in_WGS | common[name]

not_in_WGS = common[~(in_WGS)]

in_CTRL = not_in_WGS[names_CTRL[0]]

for name in names_CTRL[1:]:

in_CTRL = in_CTRL | not_in_WGS[name]

scu_variants = not_in_WGS[~(in_CTRL)]

CTRL_variants = not_in_WGS[in_CTRL]

generate_vcf(scu_variants, filtered[0], out_path + "/variants_scu.vcf")

generate_vcf(CTRL_variants, filtered[0], out_path + "/variants_CTRL.vcf")

scu_variants.to_csv(out_path + "/variants_scu.tsv", sep='\t', index=False)

CTRL_variants.to_csv(out_path + "/variants_CTRL.tsv", sep='\t', index=False)

stats = {}

stats['scu_count'] = scu_variants.shape[0]

return stats

def compare_CTRL_variants(names_WGS, names_CTRL_rna, names_CTRL_atac, path_rna, path_atac, out_path, min_alt_read_count=0, min_sc_qual=10.0):

# note: requires process_scu to be run first to generate temp files

if not os.path.exists(out_path):

os.mkdir(out_path)

mutations_WGS = load_mutation_array(path_rna + "/WGS_intermediaries", names_WGS)

mutations_CTRL_rna = load_mutation_array(path_rna + "/CTRL_intermediaries", names_CTRL_rna)

mutations_CTRL_atac = load_mutation_array(path_atac + "/CTRL_intermediaries", names_CTRL_atac)

filtered_WGS = filter_mutations(mutations_WGS, 0.0, 0, 0.0, 0, 0.0, exonic=False)

filtered_CTRL_rna = filter_mutations(mutations_CTRL_rna, 0.0, min_alt_read_count, 0.0, 0, min_sc_qual, exonic=False)

filtered_CTRL_atac = filter_mutations(mutations_CTRL_atac, 0.0, min_alt_read_count, 0.0, 0, min_sc_qual, exonic=False)

filtered = filtered_WGS + filtered_CTRL_rna + filtered_CTRL_atac

overlap_list = OverlapMutationList(filtered)

common = common_variants(overlap_list, filtered)

in_WGS = common[names_WGS[0]]

for name in names_WGS[1:]:

in_WGS = in_WGS | common[name]

yes_in_WGS = common[in_WGS]

in_rna = yes_in_WGS[names_CTRL_rna[0]]

for name in names_CTRL_rna[1:]:

in_rna = in_rna | yes_in_WGS[name]

in_atac = yes_in_WGS[names_CTRL_atac[0]]

for name in names_CTRL_atac[1:]:

in_atac = in_atac | yes_in_WGS[name]

in_rna_and_atac_and_WGS = yes_in_WGS[in_rna & in_atac]

in_rna_only_and_WGS = yes_in_WGS[in_rna & ~(in_atac)]

in_atac_only_and_WGS = yes_in_WGS[~(in_rna) & in_atac]

not_in_WGS = common[~(in_WGS)]

in_rna = not_in_WGS[names_CTRL_rna[0]]

for name in names_CTRL_rna[1:]:

in_rna = in_rna | not_in_WGS[name]

in_atac = not_in_WGS[names_CTRL_atac[0]]

for name in names_CTRL_atac[1:]:

in_atac = in_atac | not_in_WGS[name]

in_rna_and_atac = not_in_WGS[in_rna & in_atac]

in_rna_only = not_in_WGS[in_rna & ~(in_atac)]

in_atac_only = not_in_WGS[~(in_rna) & in_atac]

generate_vcf(in_rna_and_atac, filtered[0], out_path + "/variants_CTRL_both.vcf")

generate_vcf(in_rna_only, filtered[0], out_path + "/variants_CTRL_rna.vcf")

generate_vcf(in_atac_only, filtered[0], out_path + "/variants_CTRL_atac.vcf")

generate_vcf(in_rna_and_atac_and_WGS, filtered[0], out_path + "/variants_WGS_both.vcf")

generate_vcf(in_rna_only_and_WGS, filtered[0], out_path + "/variants_WGS_rna.vcf")

generate_vcf(in_atac_only_and_WGS, filtered[0], out_path + "/variants_WGS_atac.vcf")

in_rna_and_atac.to_csv(out_path + "/variants_CTRL_both.tsv", sep='\t', index=False)

in_rna_only.to_csv(out_path + "/variants_CTRL_rna.tsv", sep='\t', index=False)

in_atac_only.to_csv(out_path + "/variants_CTRL_atac.tsv", sep='\t', index=False)

stats = {}

stats['atac_rna_overlap'] = in_rna_and_atac.shape[0]

stats['rna_only'] = in_rna_only.shape[0]

stats['atac_only'] = in_atac_only.shape[0]

stats['atac_rna_overlap_WGS'] = in_rna_and_atac_and_WGS.shape[0]

stats['rna_only_WGS'] = in_rna_only_and_WGS.shape[0]

stats['atac_only_WGS'] = in_atac_only_and_WGS.shape[0]

return stats

def process_WGS_and_sc_pair(name_WGS, name_sc, out_path, _mutations_sc, _mutations_WGS, _sc_counts, bulk_sc=False, exonic=False, save_variants=False, min_cells_w_alt_count=0.0, min_alt_read_count=0, min_cell_vaf_factor=0.0, min_sc_qual=0.0, min_vaf=0.01, min_coverage=1):

names_WGS = [name_WGS]

names_sc = [name_sc]

stats = {}

mutations_sc = copy.deepcopy(_mutations_sc)

mutations_WGS = copy.deepcopy(_mutations_WGS)

sc_counts = copy.deepcopy(_sc_counts)

if bulk_sc:

filtered_sc = filter_mutations(mutations_sc, 0.0, min_alt_read_count, min_cell_vaf_factor, 0, min_sc_qual, exonic=exonic)

else:

filtered_sc = filter_mutations(mutations_sc, min_cells_w_alt_count, min_alt_read_count, min_cell_vaf_factor, 0, min_sc_qual, exonic=exonic)

filtered_WGS = filter_mutations(mutations_WGS, 0.0, 0, 0.0, 0, 0.0, exonic=exonic)

# NOTE: realized it did not make sense to keep variants that did not pass filters on sc but were found in WGS and classify these as TP, with commented out sections below, now the FN candidates include these variants

#mutations = mutations_sc + mutations_WGS

filtered = filtered_sc + filtered_WGS

#overlap_list = OverlapMutationList(filtered, unfiltered=mutations).array

overlap_obj = OverlapMutationList(filtered)

overlap_list = overlap_obj.array

stats['WGS_final_count'] = overlap_obj.get_overlap(name_WGS, name_WGS)

stats['sc_final_count'] = overlap_obj.get_overlap(name_sc, name_sc)

stats['mutual_overlap'] = overlap_obj.get_overlap(name_WGS, name_sc)

common = common_variants(overlap_list, filtered)

#rank_overlap(common, out_path + "/common_variants_all.png")

if save_variants:

common.to_csv(out_path + "/common_variants.tsv", sep='\t', index=False)

in_WGS = common[names_WGS[0]]

single_cell = common[~(in_WGS)]

in_sc = common[names_sc[0]]

whole_genome = common[~(in_sc)]

if save_variants:

single_cell.to_csv(out_path + "/single_cell_variants.tsv", sep='\t', index=False)

whole_genome.to_csv(out_path + "/whole_genome_variants.tsv", sep='\t', index=False)

generate_vcf(common, filtered[0], out_path + "/variants_common.vcf")

generate_vcf(single_cell, filtered[0], out_path + "/variants_single_cell.vcf")

generate_vcf(whole_genome, filtered[0], out_path + "/variants_whole_genome.vcf")

WGS_only_sc_counts = sc_counts.loc[sc_counts['map'].isin(whole_genome['map'])].copy()

exonic_sc = filter_mutations(mutations_sc, 0.0, 0, 0.0, 0, 0.0, exonic=exonic)

sc_WGS_overlap_sc_counts = sc_counts.loc[sc_counts['map'].isin(exonic_sc[0].parsed_mutations['map'])].copy()

WGS_sc_counts = sc_counts.loc[sc_counts['map'].isin(filtered_WGS[0].parsed_mutations['map'])].copy()

print(f"n_cells: {mutations_sc[0].n_cells}, min_cells: {min_cells_w_alt_count}")

missed_wgs_variants, _, _, _, missing_stats = count_alleles_from_coverage(WGS_only_sc_counts, min_coverage, min_alt_read_count, min_cells_w_alt_count, min_vaf)

mutual_variants, _, _, _, mutual_stats = count_alleles_from_coverage(sc_WGS_overlap_sc_counts, min_coverage, min_alt_read_count, min_cells_w_alt_count, min_vaf)

wgs_variants, _, _, _, wgs_stats = count_alleles_from_coverage(WGS_sc_counts, min_coverage, min_alt_read_count, min_cells_w_alt_count, min_vaf)

missing_stats = {'miss_' + str(key):val for key,val in missing_stats.items()}

mutual_stats = {'tp_' + str(key):val for key,val in mutual_stats.items()}

wgs_stats = {'ap_' + str(key):val for key,val in wgs_stats.items()}

stats.update(mutual_stats)

stats.update(missing_stats)

stats.update(wgs_stats)

if save_variants:

WGS_only_sc_counts.to_csv(out_path + "/WGS_only_sc_counts.tsv", sep='\t', index=False)

missed_wgs_variants.to_csv(out_path + "/WGS_missed_by_sc.tsv", sep='\t', index=False)

#whole_genome_missed_by_sc = whole_genome[whole_genome['map'].isin(missed_wgs_variants['map'])]

#generate_vcf(whole_genome_missed_by_sc, filtered[0], out_path + "/variants_whole_genome_missed_by_sc.vcf")

# TODO make a new category counting the number of variants which were rejected by min alt read count filter (or VAF filter)

#variant_stats(missed_wgs_variants, out_path + "variants_whole_genome_missed_by_sc_stats.png")

return stats

def process_scu_stats(vartrix_scu_dir, vartrix_CTRL_dir, vartrix_WGS_dir, full_vcf_scu, full_vcf_CTRL, full_vcf_WGS, shortlist_vcf, name, out_path, resume=False, min_coverage=1, min_alt_read_count=0, min_cells_w_alt_count=0, min_vaf=0.0):

stats = {}

if not resume:

sc_counts = count_vartrix(vartrix_scu_dir, full_vcf_scu)

CTRL_counts = count_vartrix(vartrix_CTRL_dir, full_vcf_CTRL)

if vartrix_WGS_dir:

WGS_counts = count_vartrix(vartrix_WGS_dir, full_vcf_WGS)

if not os.path.exists(out_path):

os.mkdir(out_path)

sc_counts.to_csv(out_path + "/vartrix_scu_" + name + "_counted.csv")

CTRL_counts.to_csv(out_path + "/vartrix_CTRL_" + name + "_counted.csv")

if vartrix_WGS_dir:

WGS_counts.to_csv(out_path + "/vartrix_WGS_" + name + "_counted.csv")

else:

sc_counts = pd.read_csv(out_path + "/vartrix_scu_" + name + "_counted.csv")

CTRL_counts = pd.read_csv(out_path + "/vartrix_CTRL_" + name + "_counted.csv")

if vartrix_WGS_dir:

WGS_counts = pd.read_csv(out_path + "/vartrix_WGS_" + name + "_counted.csv")

if shortlist_vcf:

shortlist = pd.read_csv(shortlist_vcf, sep="\t", comment="#", names=["chrom", "pos", "id", "ref", "alt", "qual", "filter", "info"])

shortlist['map'] = shortlist['chrom'].astype(str) + ':' + shortlist['pos'].astype(int).astype(str) + ':' + shortlist['ref'] + '->' + shortlist['alt']

stats['scu_total'] = sc_counts.shape[0]

stats['CTRL_total'] = CTRL_counts.shape[0]

if vartrix_WGS_dir:

stats['WGS_total'] = WGS_counts.shape[0]

if shortlist_vcf:

scu_shortlisted = sc_counts[sc_counts['map'].isin(shortlist['map'])]

else:

scu_shortlisted = sc_counts

_, _, _, _, scu_stats = count_alleles_from_coverage(scu_shortlisted, min_coverage, min_alt_read_count, min_cells_w_alt_count, min_vaf)

_, _, _, _, CTRL_stats = count_alleles_from_coverage(CTRL_counts, min_coverage, min_alt_read_count, min_cells_w_alt_count, min_vaf)

if vartrix_WGS_dir:

_, _, _, _, WGS_stats = count_alleles_from_coverage(WGS_counts, min_coverage, min_alt_read_count, min_cells_w_alt_count, min_vaf)

scu_stats = {'scu_' + str(key):val for key,val in scu_stats.items()}

CTRL_stats = {'CTRL_' + str(key):val for key,val in CTRL_stats.items()}

if vartrix_WGS_dir:

WGS_stats = {'WGS_' + str(key):val for key,val in WGS_stats.items()}

stats.update(scu_stats)

stats.update(CTRL_stats)

if vartrix_WGS_dir:

stats.update(WGS_stats)

return stats

def count_alleles_from_coverage(allele_counts, min_coverage, min_alt_coverage, min_cells_w_alt_count, min_vaf):

stats = {}

# obtain stats

allele_counts['vaf'] = allele_counts['alt_count'] / (allele_counts['alt_count'] + allele_counts['ref_count'])

allele_counts['coverage'] = allele_counts['alt_count'] + allele_counts['ref_count']

allele_counts['depth'] = allele_counts['coverage'] / allele_counts['cell_count']

# filter by min coverage

total_variants = len(allele_counts)

with_coverage = allele_counts[allele_counts['coverage'] >= min_coverage]

total_no_coverage = total_variants - len(with_coverage)

# filter by vaf

above_vaf_cutoff = with_coverage[with_coverage['vaf'] >= min_vaf]

total_above_vaf = len(above_vaf_cutoff)

total_below_vaf = len(with_coverage) - len(above_vaf_cutoff)

# filter by min alt coverage

with_min_alt_coverage = above_vaf_cutoff[above_vaf_cutoff['alt_count'] >= min_alt_coverage]

total_below_min_alt_coverage = len(above_vaf_cutoff) - len(with_min_alt_coverage)

total_above_min_alt_coverage = len(with_min_alt_coverage)

# filter by cell count

with_min_cell_count = above_vaf_cutoff[above_vaf_cutoff['cells_w_alt_count'] >= min_cells_w_alt_count]

total_below_min_cell_count = len(above_vaf_cutoff) - len(with_min_cell_count)

total_above_min_cell_count = len(with_min_cell_count)

# filter by systematic dropout

systematic_dropout = with_coverage[with_coverage['alt_count'] == 0]

total_systematic_above_min_coverage = len(systematic_dropout)

print(f"Total variants: {total_variants}")

print(f"Variants with no coverage: {total_no_coverage} ({total_no_coverage/total_variants*100}%)")

print(f"Variants not passing vaf cutoff: {total_below_vaf} ({total_below_vaf/total_variants*100}%)")

print(f"Variants with allele support: {total_above_vaf} ({total_above_vaf/total_variants*100}%)")

print(f"Variants without allele support (according to min_alt_coverage): {total_below_min_alt_coverage} ({total_below_min_alt_coverage/(len(above_vaf_cutoff)+sys.float_info.epsilon)*100}%)")

print(f"Variants with allele support (according to min_alt_coverage): {total_above_min_alt_coverage} ({total_above_min_alt_coverage/(len(above_vaf_cutoff)+sys.float_info.epsilon)*100}%)")

print(f"Variants without allele support (according to min_cell_count): {total_below_min_cell_count} ({total_below_min_cell_count/(len(above_vaf_cutoff)+sys.float_info.epsilon)*100}%)")

print(f"Variants with allele support (according to min_cell_count): {total_above_min_cell_count} ({total_above_min_cell_count/(len(above_vaf_cutoff)+sys.float_info.epsilon)*100}%)")

print(f"Variants with Systematic Dropout (according to min_coverage): {total_systematic_above_min_coverage}")

stats['below_coverage'] = total_no_coverage

stats['above_coverage'] = total_variants

stats['below_vaf'] = total_below_vaf

stats['above_vaf'] = total_above_vaf

stats['below_min_alt_cov'] = total_below_min_alt_coverage

stats['above_min_alt_cov'] = total_above_min_alt_coverage

stats['below_min_cell_count'] = total_below_min_cell_count

stats['above_min_cell_count'] = total_above_min_cell_count

return above_vaf_cutoff, with_min_alt_coverage, with_min_cell_count, systematic_dropout, stats

def count_overlap_vartrix_pair(vardir_rna, vcfdir_rna, vardir_atac, vcfdir_atac, vardir_unique_rna, vcfdir_unique_rna, vardir_unique_atac, vcfdir_unique_atac, asedir_WGS, out_path, min_vaf_filter = 0.0, max_vaf_filter = 1.0, alt_filter = 0, min_alt_count_WGS = 0, min_vaf_WGS = 0.0, resume=False):

stats = {}

if not resume:

rna_count = count_vartrix(vardir_rna, vcfdir_rna)

atac_count = count_vartrix(vardir_atac, vcfdir_atac)

rna_unique_count = count_vartrix(vardir_unique_rna, vcfdir_unique_rna)

atac_unique_count = count_vartrix(vardir_unique_atac, vcfdir_unique_atac)

WGS_count = count_ase_reader(asedir_WGS)

if not os.path.exists(out_path):

os.mkdir(out_path)

rna_count.to_csv(out_path + "/vartrix_rna_counted.csv")

atac_count.to_csv(out_path + "/vartrix_atac_counted.csv")

WGS_count.to_csv(out_path + "/asereader_WGS_counted.csv")

rna_unique_count.to_csv(out_path + "/vartrix_unique_rna_counted.csv")

atac_unique_count.to_csv(out_path + "/vartrix_unique_atac_counted.csv")

else:

rna_count = pd.read_csv(out_path + "/vartrix_rna_counted.csv")

atac_count = pd.read_csv(out_path + "/vartrix_atac_counted.csv")

rna_unique_count = pd.read_csv(out_path + "/vartrix_unique_rna_counted.csv")

atac_unique_count = pd.read_csv(out_path + "/vartrix_unique_atac_counted.csv")

WGS_count = pd.read_csv(out_path + "/asereader_WGS_counted.csv")

rna_count['vaf'] = rna_count['alt_count'] / (rna_count['alt_count'] + rna_count['ref_count'])

atac_count['vaf'] = atac_count['alt_count'] / (atac_count['alt_count'] + atac_count['ref_count'])

rna_unique_count['vaf'] = rna_unique_count['alt_count'] / (rna_unique_count['alt_count'] + rna_unique_count['ref_count'])

atac_unique_count['vaf'] = atac_unique_count['alt_count'] / (atac_unique_count['alt_count'] + atac_unique_count['ref_count'])

WGS_count['vaf'] = WGS_count['alt_count'] / (WGS_count['alt_count'] + WGS_count['ref_count'])

rna_count = rna_count[rna_count['vaf'] > min_vaf_filter]

atac_count = atac_count[atac_count['vaf'] > min_vaf_filter]

rna_unique_count = rna_unique_count[rna_unique_count['vaf'] > min_vaf_filter]

atac_unique_count = atac_unique_count[atac_unique_count['vaf'] > min_vaf_filter]

rna_count = rna_count[rna_count['vaf'] <= max_vaf_filter]

atac_count = atac_count[atac_count['vaf'] <= max_vaf_filter]

rna_unique_count = rna_unique_count[rna_unique_count['vaf'] <= max_vaf_filter]

atac_unique_count = atac_unique_count[atac_unique_count['vaf'] <= max_vaf_filter]

rna_count = rna_count[rna_count['alt_count'] > alt_filter]

atac_count = atac_count[atac_count['alt_count'] > alt_filter]

rna_unique_count = rna_unique_count[rna_unique_count['alt_count'] > alt_filter]

atac_unique_count = atac_unique_count[atac_unique_count['alt_count'] > alt_filter]

WGS_count = WGS_count[WGS_count['alt_count'] >= min_alt_count_WGS]

WGS_count = WGS_count[WGS_count['vaf'] >= min_vaf_WGS]

rna_count_NWGS = rna_count[~(rna_count['map'].isin(WGS_count['map']))]

atac_count_NWGS = atac_count[~(atac_count['map'].isin(WGS_count['map']))]

rna_unique_count_NWGS = rna_unique_count[~(rna_unique_count['map'].isin(WGS_count['map']))]

atac_unique_count_NWGS = atac_unique_count[~(atac_unique_count['map'].isin(WGS_count['map']))]

#rna_count_NWGS = rna_count

#atac_count_NWGS = atac_count

#rna_unique_count_NWGS = rna_unique_count

#atac_unique_count_NWGS = atac_unique_count

rna_overlap = rna_count_NWGS[rna_count_NWGS['map'].isin(atac_count_NWGS['map'])]

atac_overlap = atac_count_NWGS[atac_count_NWGS['map'].isin(rna_count_NWGS['map'])]

stats['rna_count'] = len(rna_count_NWGS)

stats['atac_count'] = len(atac_count_NWGS)

stats['overlap_count'] = len(rna_overlap)

stats['rna_unique_count'] = len(rna_unique_count_NWGS)

stats['atac_unique_count'] = len(atac_unique_count_NWGS)

generate_vcf(rna_overlap, "/<path to>/header.txt", out_path + "/variants_overlap.vcf")

return rna_overlap, atac_overlap, stats

def iterate_extract_scu_over_filter(scu_sample_dict_list, filter_dict, outfolder, filter_study_name, resume=False):

stats_lists = {scu_sample_dict['name']:[] for scu_sample_dict in scu_sample_dict_list}

stats = {}

for filters in filter_dict:

for scu_sample_dict in scu_sample_dict_list:

stats_lists[scu_sample_dict['name']].append(extract_scu_variants(

scu_sample_dict['lists_WGS'],

scu_sample_dict['names_WGS'],

scu_sample_dict['lists_CTRL'],

scu_sample_dict['names_CTRL'],

scu_sample_dict['lists_sc'],

scu_sample_dict['names_sc'],

outfolder + "/" + scu_sample_dict['name'] + "/",

resume=resume,

min_cells_w_alt_count=filters['min_cell_count'],

min_alt_read_count=filters['min_alt_reads'],

min_cell_vaf_factor=filters['min_cell_vaf_factor'],

min_sc_qual=filters['min_sc_qual'],

max_alt_read_count=filters['max_alt_reads'],

max_cells_w_alt_count=filters['max_cell_count']))

resume = True

for scu_sample_dict in scu_sample_dict_list:

stats[scu_sample_dict['name']] = pd.DataFrame(stats_lists[scu_sample_dict['name']])

stats[scu_sample_dict['name']]['min_cell_count'] = [filters['min_cell_count'] for filters in filter_dict]

stats[scu_sample_dict['name']]['min_alt_reads'] = [filters['min_alt_reads'] for filters in filter_dict]

stats[scu_sample_dict['name']]['min_cell_vaf_factor'] = [filters['min_cell_vaf_factor'] for filters in filter_dict]

stats[scu_sample_dict['name']]['min_sc_qual'] = [filters['min_sc_qual'] for filters in filter_dict]

stats[scu_sample_dict['name']]['max_alt_reads'] = [filters['max_alt_reads'] for filters in filter_dict]

stats[scu_sample_dict['name']]['max_cell_count'] = [filters['max_cell_count'] for filters in filter_dict]

stats[scu_sample_dict['name']].to_csv(outfolder + "/" + scu_sample_dict['name'] + "_" + filter_study_name + ".csv")

def iterate_compare_CTRL_variants_over_filter(sample_dict_list, filter_dict, outfolder, filter_study_name, resume=False):

stats_lists = {sample_dict['name']:[] for sample_dict in sample_dict_list}

stats = {}

for filters in filter_dict:

for sample_dict in sample_dict_list:

stats_lists[sample_dict['name']].append(compare_CTRL_variants(

sample_dict['names_WGS'],

sample_dict['names_CTRL_rna'],

sample_dict['names_CTRL_atac'],

sample_dict['path_rna'] + "/" + sample_dict['name'] + "/",

sample_dict['path_atac'] + "/" + sample_dict['name'] + "/",

outfolder + "/" + sample_dict['name'] + "/",

min_alt_read_count=filters['min_alt_reads'],

min_sc_qual=filters['min_sc_qual']))

for sample_dict in sample_dict_list:

stats[sample_dict['name']] = pd.DataFrame(stats_lists[sample_dict['name']])

stats[sample_dict['name']]['min_alt_reads'] = [filters['min_alt_reads'] for filters in filter_dict]

stats[sample_dict['name']]['min_sc_qual'] = [filters['min_sc_qual'] for filters in filter_dict]

stats[sample_dict['name']].to_csv(outfolder + "/" + sample_dict['name'] + "_" + filter_study_name + ".csv")

def iterate_process_scu_stats(sample_dict_list, filter_dict, outfolder, filter_study_name, resume=False):

stats_lists = {sample_dict['name']:[] for sample_dict in sample_dict_list}

stats = {}

for filters in filter_dict:

for sample_dict in sample_dict_list:

stats_lists[sample_dict['name']].append(process_scu_stats(

sample_dict['vartrix_scu'],

sample_dict['vartrix_CTRL'],

sample_dict['vartrix_WGS'],

sample_dict['full_vcf_scu'],

sample_dict['full_vcf_CTRL'],

sample_dict['full_vcf_WGS'],

sample_dict['shortlist_vcf'],

sample_dict['name'],

outfolder + "/" + sample_dict['name'] + "/",

resume=resume,

min_coverage=filters['min_coverage'],

min_alt_read_count=filters['min_alt_reads'],

min_cells_w_alt_count=filters['min_cell_count'],

min_vaf=filters['min_cell_vaf_factor']))

resume = True

for sample_dict in sample_dict_list:

stats[sample_dict['name']] = pd.DataFrame(stats_lists[sample_dict['name']])

stats[sample_dict['name']]['min_cell_count'] = [filters['min_cell_count'] for filters in filter_dict]

stats[sample_dict['name']]['min_alt_reads'] = [filters['min_alt_reads'] for filters in filter_dict]

stats[sample_dict['name']]['min_cell_vaf_factor'] = [filters['min_cell_vaf_factor'] for filters in filter_dict]

stats[sample_dict['name']]['min_coverage'] = [filters['min_coverage'] for filters in filter_dict]

stats[sample_dict['name']].to_csv(outfolder + "/" + sample_dict['name'] + "_" + filter_study_name + ".csv")

def iterate_process_pair_over_filter(sample_pair_dict_list, filter_dict, outfolder, filter_study_name, resume=False, bulk_sc=False, exonic=False, save_variants=False):

stats_lists = {sample_pair_dict['name']:[] for sample_pair_dict in sample_pair_dict_list}

stats = {}

for sample_pair_dict in sample_pair_dict_list:

out_path = outfolder + "/" + sample_pair_dict['name'] + "/"

lists_WGS = [sample_pair_dict['list_WGS']]

names_WGS = [sample_pair_dict['name_WGS']]

lists_sc = [sample_pair_dict['list_sc']]

names_sc = [sample_pair_dict['name_sc']]

stats = {}

if not resume:

cells_WGS = get_cell_lists(lists_WGS, names_WGS)

cells_sc = get_cell_lists(lists_sc, names_sc)

mutations_WGS = get_mutations(cells_WGS)

mutations_sc = get_mutations(cells_sc)

sc_counts = count_vartrix(sample_pair_dict['vartrix'], sample_pair_dict['full_vcf'])

if not os.path.exists(out_path):

os.mkdir(out_path)

save_mutation_array(mutations_WGS, out_path + "/WGS_intermediaries")

save_mutation_array(mutations_sc, out_path + "/sc_intermediaries")

sc_counts.to_csv(out_path + "/vartrix_WGS_" + sample_pair_dict['name_sc'] + "_counted.csv")

else:

mutations_WGS = load_mutation_array(out_path + "/WGS_intermediaries", names_WGS)

mutations_sc = load_mutation_array(out_path + "sc_intermediaries", names_sc)

sc_counts = pd.read_csv(out_path + "/vartrix_WGS_" + sample_pair_dict['name_sc'] + "_counted.csv")

for filters in filter_dict:

stats_lists[sample_pair_dict['name']].append(process_WGS_and_sc_pair(

sample_pair_dict['name_WGS'],

sample_pair_dict['name_sc'],

out_path,

mutations_sc,

mutations_WGS,

sc_counts,

bulk_sc=bulk_sc,

exonic=exonic,

save_variants=save_variants,

min_cells_w_alt_count=filters['min_cell_count'],

min_alt_read_count=filters['min_alt_reads'],

min_cell_vaf_factor=filters['min_cell_vaf_factor'],

min_sc_qual=filters['min_sc_qual'],

min_vaf=filters['min_vaf'],

min_coverage=filters['min_coverage']))

resume = True

for sample_pair_dict in sample_pair_dict_list:

stats[sample_pair_dict['name']] = pd.DataFrame(stats_lists[sample_pair_dict['name']])

stats[sample_pair_dict['name']]['min_cell_count'] = [filters['min_cell_count'] for filters in filter_dict]

stats[sample_pair_dict['name']]['min_alt_reads'] = [filters['min_alt_reads'] for filters in filter_dict]

stats[sample_pair_dict['name']]['min_cell_vaf_factor'] = [filters['min_cell_vaf_factor'] for filters in filter_dict]

stats[sample_pair_dict['name']]['min_sc_qual'] = [filters['min_sc_qual'] for filters in filter_dict]

stats[sample_pair_dict['name']]['min_vaf'] = [filters['min_vaf'] for filters in filter_dict]

stats[sample_pair_dict['name']].to_csv(outfolder + "/" + sample_pair_dict['name'] + "_" + filter_study_name + ".csv")

def iterate_count_overlap_vartrix(sample_pair_dict_list, filter_dict, outfolder, filter_study_name, resume=False):

stats_lists = {sample_pair_dict['name']:[] for sample_pair_dict in sample_pair_dict_list}

stats = {}

for filters in filter_dict:

for sample_pair_dict in sample_pair_dict_list:

_, _, stats = count_overlap_vartrix_pair(

sample_pair_dict['vardir_rna'],

sample_pair_dict['vcfdir_rna'],

sample_pair_dict['vardir_atac'],

sample_pair_dict['vcfdir_atac'],

sample_pair_dict['vardir_unique_rna'],

sample_pair_dict['vcfdir_unique_rna'],

sample_pair_dict['vardir_unique_atac'],

sample_pair_dict['vcfdir_unique_atac'],

sample_pair_dict['asedir_WGS'],

outfolder + "/" + sample_pair_dict['name'] + "/",

min_vaf_filter = filters['min_vaf'],

max_vaf_filter = filters['max_vaf'],

alt_filter = filters['min_alt_count'],

min_alt_count_WGS = filters['min_alt_count_WGS'],

min_vaf_WGS = filters['min_vaf_WGS'],

resume=resume)

stats_lists[sample_pair_dict['name']].append(stats)

resume = True

for sample_pair_dict in sample_pair_dict_list:

stats[sample_pair_dict['name']] = pd.DataFrame(stats_lists[sample_pair_dict['name']])

stats[sample_pair_dict['name']]['min_vaf'] = [filters['min_vaf'] for filters in filter_dict]

stats[sample_pair_dict['name']]['max_vaf'] = [filters['max_vaf'] for filters in filter_dict]

stats[sample_pair_dict['name']]['min_alt_count'] = [filters['min_alt_count'] for filters in filter_dict]

stats[sample_pair_dict['name']].to_csv(outfolder + "/" + sample_pair_dict['name'] + "_" + filter_study_name + ".csv")

def intersect_scu(tsv1, tsv2, outfile, vcfheader=None):

list1 = pd.read_csv(tsv1, sep='\t')

list2 = pd.read_csv(tsv2, sep='\t')

isec = list1[list1['map'].isin(list2['map'])]

isec.to_csv(outfile, sep='\t', index=False)

if vcfheader:

generate_vcf(isec, vcfheader, outfile.split('.tsv')[0] + '.vcf')

def process_scu():

resume = True

outfolder = "/<path to>/hapcaller_sc_rna_max_all_exonic/"

min_cell_count_base = 0.0

min_cell_vaf_factor_base = 0.0

min_sc_qual_base = 0.0

min_alt_reads_base = 0

max_cell_count_base = None

max_alt_reads_base = None

min_cell_counts = [0.0, 1.0, 5.0, 10.0, 50.0, 100.0, 200.0]

min_sc_quals = [0.0, 1.0, 2.0, 3.0, 4.0, 5.0, 6.0, 7.0, 8.0, 9.0, 10.0, 20.0, 50.0, 100.0, 200.0]

#min_cell_vaf_factors = [0.0, 1e-5, 1e-4, 1e-3, 1e-2, 1e-1, 0.5, 0.9]

if not os.path.exists(outfolder):

os.mkdir(outfolder)

list_WGS_EPSRC1 = "/<path to>/WGS/EPSRC1dna/cell_list_consensus.txt"

list_WGS_EPSRC2 = "/<path to>/WGS/EPSRC2dna/cell_list_consensus.txt"

list_WGS_EPSRC4 = "/<path to>/WGS/EPSRC4dna/cell_list_consensus.txt"

list_WGS_CTRL = [list_WGS_EPSRC1, list_WGS_EPSRC2, list_WGS_EPSRC4]

name_WGS_EPSRC1 = 'EPSRC1dna'

name_WGS_EPSRC2 = 'EPSRC2dna'

name_WGS_EPSRC4 = 'EPSRC4dna'

name_WGS_CTRL = [name_WGS_EPSRC1, name_WGS_EPSRC2, name_WGS_EPSRC4]

list_str_EPSRC1 = "/<path to>/EPSRC_splits/EpSRCrna1/cell_list_bulk_strelka.txt"

list_str_EPSRC2 = "/<path to>/EPSRC_splits/EpSRCrna2/cell_list_bulk_strelka.txt"

list_str_EPSRC4 = "/<path to>/EPSRC_splits/EpSRCrnac4/cell_list_bulk_strelka.txt"

list_str_CTRL = "/<path to>/EPSRC_splits/EpSRCrnaCTRL/cell_list_bulk_strelka.txt"

name_str_EPSRC1 = 'EPSRC1rna_strelka'

name_str_EPSRC2 = 'EPSRC2rna_strelka'

name_str_EPSRC4 = 'EPSRC4rna_strelka'

name_str_CTRL = 'CTRLrna_strelka'

list_sam_EPSRC1 = "/<path to>/EPSRC_splits/EpSRCrna1/cell_list_bulk_samtools.txt"

list_sam_EPSRC2 = "/<path to>/EPSRC_splits/EpSRCrna2/cell_list_bulk_samtools.txt"

list_sam_EPSRC4 = "/<path to>/EPSRC_splits/EpSRCrna4/cell_list_bulk_samtools.txt"

list_sam_CTRL = "/<path to>/EPSRC_splits/EpSRCrnaCTRL/cell_list_bulk_samtools.txt"

name_sam_EPSRC1 = 'EPSRC1rna_samtools'

name_sam_EPSRC2 = 'EPSRC2rna_samtools'

name_sam_EPSRC4 = 'EPSRC4rna_samtools'

name_sam_CTRL = 'CTRLrna_samtools'

list_hap_EPSRC1 = "/<path to>/EPSRC_splits/EpSRCrna1/cell_list_bulk_hapcaller.txt"

list_hap_EPSRC2 = "/<path to>/EPSRC_splits/EpSRCrna2/cell_list_bulk_hapcaller.txt"

list_hap_EPSRC4 = "/<path to>/EPSRC_splits/EpSRCrna4/cell_list_bulk_hapcaller.txt"

list_hap_CTRL = "/<path to>/EPSRC_splits/EpSRCrnaCTRL/cell_list_bulk_hapcaller.txt"

name_hap_EPSRC1 = 'EPSRC1rna_hapcaller'

name_hap_EPSRC2 = 'EPSRC2rna_hapcaller'

name_hap_EPSRC4 = 'EPSRC4rna_hapcaller'

name_hap_CTRL = 'CTRLrna_hapcaller'

list_sc_EPSRC1 = "/<path to>/EPSRC_splits/EpSRCrna1/cell_list_hapcaller.txt"

list_sc_EPSRC2 = "/<path to>/EPSRC_splits/EpSRCrna2/cell_list_hapcaller.txt"

list_sc_EPSRC4 = "/<path to>/EPSRC_splits/EpSRCrna4/cell_list_hapcaller.txt"

list_sc_CTRL = "/<path to>/EPSRC_splits/EpSRCrnaCTRL/cell_list_hapcaller.txt"

name_sc_EPSRC1 = 'EPSRC1rna'

name_sc_EPSRC2 = 'EPSRC2rna'

name_sc_EPSRC4 = 'EPSRC4rna'

name_sc_CTRL = 'CTRLrna'

EPSRC1_scu_sample_dict = {'name':'EPSRC1','lists_WGS':[list_WGS_EPSRC1],'names_WGS':[name_WGS_EPSRC1],'lists_CTRL':[list_str_EPSRC1,list_sam_EPSRC1,list_hap_EPSRC1],'names_CTRL':[name_str_EPSRC1,name_sam_EPSRC1,name_hap_EPSRC1],'lists_sc':[list_sc_EPSRC1],'names_sc':[name_sc_EPSRC1]}

EPSRC2_scu_sample_dict = {'name':'EPSRC2','lists_WGS':[list_WGS_EPSRC2],'names_WGS':[name_WGS_EPSRC2],'lists_CTRL':[list_str_EPSRC2,list_sam_EPSRC2,list_hap_EPSRC2],'names_CTRL':[name_str_EPSRC2,name_sam_EPSRC2,name_hap_EPSRC2],'lists_sc':[list_sc_EPSRC2],'names_sc':[name_sc_EPSRC2]}

EPSRC4_scu_sample_dict = {'name':'EPSRC4','lists_WGS':[list_WGS_EPSRC4],'names_WGS':[name_WGS_EPSRC4],'lists_CTRL':[list_str_EPSRC4,list_sam_EPSRC4,list_hap_EPSRC4],'names_CTRL':[name_str_EPSRC4,name_sam_EPSRC4,name_hap_EPSRC4],'lists_sc':[list_sc_EPSRC4],'names_sc':[name_sc_EPSRC4]}

CTRL_scu_sample_dict = {'name':'CTRL','lists_WGS':list_WGS_CTRL,'names_WGS':name_WGS_CTRL,'lists_CTRL':[list_str_CTRL,list_sam_CTRL,list_hap_CTRL],'names_CTRL':[name_str_CTRL,name_sam_CTRL,name_hap_CTRL],'lists_sc':[list_sc_CTRL],'names_sc':[name_sc_CTRL]}

scu_sample_dict_list = [EPSRC1_scu_sample_dict, EPSRC2_scu_sample_dict, EPSRC4_scu_sample_dict, CTRL_scu_sample_dict]

min_cell_count_filter_dict = [{'min_cell_count':i,'min_alt_reads':min_alt_reads_base,'min_cell_vaf_factor':min_cell_vaf_factor_base,'min_sc_qual':min_sc_qual_base,'max_alt_reads':max_alt_reads_base,'max_cell_count':max_cell_count_base} for i in min_cell_counts]

standard_output_dict = [{'min_cell_count':0.0,'min_alt_reads':0,'min_cell_vaf_factor':0.0,'min_sc_qual':100.0,'max_alt_reads':None,'max_cell_count':None}]

min_sc_qual_filter_dict = [{'min_cell_count':min_cell_count_base,'min_alt_reads':min_alt_reads_base,'min_cell_vaf_factor':min_cell_vaf_factor_base,'min_sc_qual':i,'max_alt_reads':max_alt_reads_base,'max_cell_count':max_cell_count_base} for i in min_sc_quals]

#min_cell_vaf_factor_dict = [{'min_cell_count':min_cell_count_base,'min_alt_reads':min_alt_reads_base,'min_cell_vaf_factor':i,'min_sc_qual':100.0,'max_alt_reads':max_alt_reads_base,'max_cell_count':max_cell_count_base} for i in min_cell_vaf_factors]

#iterate_extract_scu_over_filter(scu_sample_dict_list, min_cell_count_filter_dict, outfolder, 'cell_count_filter_stats', resume=resume)

#iterate_extract_scu_over_filter(scu_sample_dict_list, min_sc_qual_filter_dict, outfolder, 'min_sc_qual_filter_stats', resume=True)

#iterate_extract_scu_over_filter(scu_sample_dict_list, min_cell_vaf_factor_dict, outfolder, 'min_cell_vaf_factors_stats_100', resume=True)

iterate_extract_scu_over_filter(scu_sample_dict_list, standard_output_dict, outfolder, 'standard_stats', resume=True)

def scu_stats():

resume = False

outfolder = "/<path to>/scu_results/scu_atac_40_100_stats"

min_cell_count_base = 0.0

min_cell_vaf_factor_base = 0.0 # changed this, probably should be 0

min_alt_reads_base = 0

min_coverage_base = 1

min_coverages = [1,2,4,10,20,40,100,200,400,1000,2000,4000,10000]

min_cell_vaf_factors = [0.0, 1e-5, 1e-4, 1e-3, 1e-2, 1e-1, 0.5, 0.9]

if not os.path.exists(outfolder):

os.mkdir(outfolder)

vartrix_WGS_EPSRC1 = "/<path to>/vartrix_WGS_sc_counts_consensus/EPSRC1atac_all_WGS_in_sc_counts/"

full_vcf_WGS_EPSRC1 = "/<path to>/WGS/EPSRC1_variants/EPSRC1_consensus/consensus3_atac.vcf.gz"

vartrix_WGS_EPSRC2 = "/<path to>/vartrix_WGS_sc_counts_consensus/EPSRC2atac_all_WGS_in_sc_counts/"

full_vcf_WGS_EPSRC2 = "/<path to>/EPSRC2_variants/EPSRC2_consensus/consensus3_atac.vcf.gz"

vartrix_WGS_EPSRC4 = "/<path to>/vartrix_WGS_sc_counts_consensus/EPSRC4atac_all_WGS_in_sc_counts/"

full_vcf_WGS_EPSRC4 = "/<path to>/WGS/EPSRC4_variants/EPSRC4_consensus/consensus3_atac.vcf.gz"

vartrix_WGS_CTRL = None

full_vcf_WGS_CTRL = None

vartrix_CTRL_EPSRC1 = "/<path to>/scu_results/vartrix_counts_CTRL/EPSRC1atac/"

full_vcf_CTRL_EPSRC1 = "/<path to>/scu_results/CTRL_variants/EPSRC1atac_CTRL.vcf"

vartrix_CTRL_EPSRC2 = "/<path to>/scu_results/vartrix_counts_CTRL/EPSRC2atac/"

full_vcf_CTRL_EPSRC2 = "/<path to>/scu_results/CTRL_variants/EPSRC2atac_CTRL.vcf"

vartrix_CTRL_EPSRC4 = "/<path to>/scu_results/vartrix_counts_CTRL/EPSRC4atac/"

full_vcf_CTRL_EPSRC4 = "/<path to>/scu_results/CTRL_variants/EPSRC4atac_CTRL.vcf"

vartrix_CTRL_CTRL = "/<path to>/scu_results/vartrix_counts_CTRL/CTRLatac/"

full_vcf_CTRL_CTRL = "/<path to>/scu_results/CTRL_variants/CTRLatac_CTRL.vcf"

vartrix_scu_EPSRC1 = "/<path to>/scu_results/vartrix_counts_scu_40_100/EPSRC1atac/"

full_vcf_scu_EPSRC1 = "/<path to>/scu_results/EPSRC1atac_scu_isec_40_100.vcf"

vartrix_scu_EPSRC2 = "/<path to>/scu_results/vartrix_counts_scu_40_100/EPSRC2atac/"

full_vcf_scu_EPSRC2 = "/<path to>/scu_results/EPSRC2atac_scu_isec_40_100.vcf"

vartrix_scu_EPSRC4 = "/<path to>/scu_results/vartrix_counts_scu_40_100/EPSRC4atac/"

full_vcf_scu_EPSRC4 = "/<path to>/scu_results/EPSRC4atac_scu_isec_40_100.vcf"

vartrix_scu_CTRL = "/<path to>/scu_results/vartrix_counts_scu_40_100/CTRLatac/"

full_vcf_scu_CTRL = "/<path to>/scu_results/CTRLatac_scu_isec_40_100.vcf"

shortlist_vcf_EPSRC1 = None

shortlist_vcf_EPSRC2 = None

shortlist_vcf_EPSRC4 = None

shortlist_vcf_CTRL = None

EPSRC1_dict = {'name':'EPSRC1','vartrix_WGS':vartrix_WGS_EPSRC1,'full_vcf_WGS':full_vcf_WGS_EPSRC1,'vartrix_CTRL':vartrix_CTRL_EPSRC1,'full_vcf_CTRL':full_vcf_CTRL_EPSRC1,'vartrix_scu':vartrix_scu_EPSRC1,'full_vcf_scu':full_vcf_scu_EPSRC1,'shortlist_vcf':shortlist_vcf_EPSRC1}

EPSRC2_dict = {'name':'EPSRC2','vartrix_WGS':vartrix_WGS_EPSRC2,'full_vcf_WGS':full_vcf_WGS_EPSRC2,'vartrix_CTRL':vartrix_CTRL_EPSRC2,'full_vcf_CTRL':full_vcf_CTRL_EPSRC2,'vartrix_scu':vartrix_scu_EPSRC2,'full_vcf_scu':full_vcf_scu_EPSRC2,'shortlist_vcf':shortlist_vcf_EPSRC2}

EPSRC4_dict = {'name':'EPSRC4','vartrix_WGS':vartrix_WGS_EPSRC4,'full_vcf_WGS':full_vcf_WGS_EPSRC4,'vartrix_CTRL':vartrix_CTRL_EPSRC4,'full_vcf_CTRL':full_vcf_CTRL_EPSRC4,'vartrix_scu':vartrix_scu_EPSRC4,'full_vcf_scu':full_vcf_scu_EPSRC4,'shortlist_vcf':shortlist_vcf_EPSRC4}

CTRL_dict = {'name':'CTRL','vartrix_WGS':vartrix_WGS_CTRL,'full_vcf_WGS':full_vcf_WGS_CTRL,'vartrix_CTRL':vartrix_CTRL_CTRL,'full_vcf_CTRL':full_vcf_CTRL_CTRL,'vartrix_scu':vartrix_scu_CTRL,'full_vcf_scu':full_vcf_scu_CTRL,'shortlist_vcf':shortlist_vcf_CTRL}

sample_dict_list = [EPSRC1_dict, EPSRC2_dict, EPSRC4_dict, CTRL_dict]

min_coverage_filter_dict = [{'min_cell_count':min_cell_count_base,'min_alt_reads':min_alt_reads_base,'min_cell_vaf_factor':min_cell_vaf_factor_base,'min_coverage':i} for i in min_coverages]

min_cell_vaf_factor_filter_dict = [{'min_cell_count':min_cell_count_base,'min_alt_reads':min_alt_reads_base,'min_cell_vaf_factor':i,'min_coverage':min_coverage_base} for i in min_cell_vaf_factors]

iterate_process_scu_stats(sample_dict_list, min_coverage_filter_dict, outfolder, 'min_coverage_stats', resume=resume)

iterate_process_scu_stats(sample_dict_list, min_cell_vaf_factor_filter_dict, outfolder, 'min_vaf_stats', resume=True)

"""

sample_dict: a list of samples containing according WGS and single-cell variant calling information, which include:

"name": overall sample name i.e. "EPSRC1"

"list_WGS": cell list for WGS variants

"name_WGS": name for WGS dataset, i.e. "EPSRC1dna"

"list_sc": cell list for single-cell variants

"name_sc": name for single-cell dataset, i.e. "EPSRC1rna"

"vartrix":"/<path to>/vartrix_WGS_sc_counts_consensus/EPSRC4rna_all_WGS_in_sc_counts/",

"full_vcf":"/<path to>/WGS/EPSRC4dna/variants_consensus/pseudo_cell/consensus3.vcf.gz"

"""

def process_WGS_v_sc(sample_dict_path: str, filter_dict_path: str, test_name: str, resume: bool):

print(f"process_WGS_v_sc: {locals()}")

with open(sample_dict_path) as f:

sample_json = json.load(f)

if not os.path.exists(sample_json["working"]):

os.mkdir(sample_json["working"])

with open(filter_dict_path) as f:

filter_json = json.load(f)

iterables = filter_json["iterables"]

for it_name, it_list in iterables.items():

valid_filters = ["min_cell_count", "min_alt_reads", "min_cell_vaf_factor", "min_sc_qual", "min_vaf", "min_coverage"]

if not it_name in valid_filters:

raise ValueError(f"Invalid filter iterable: {it_name}")

if not set(filter_json["base"].keys()) == set(valid_filters):

raise ValueError(f"Invalid base filters: {filter_json['base'].keys()}; should be {valid_filters}")

filter_dict_list = []

for it in it_list:

filter_dict = filter_json["base"].copy()

filter_dict[it_name] = it

filter_dict_list.append(filter_dict)

print(f"running filter: {filter_dict}")

iterate_process_pair_over_filter(sample_json["samples"], filter_dict_list, sample_json["working"], test_name + "_varying_" + it_name, resume=resume, bulk_sc=filter_json["is_bulk"], exonic=filter_json["exonic"], save_variants=filter_json["save_variants"])

def process_compare_CTRL_variants():

outfolder = "/<path to>/compare_rna_atac_results/CTRL_overlap_all/"

min_sc_qual_base = 0.0

min_alt_reads_base = 0

min_alt_reads = [1,5,10,20,30,50]

if not os.path.exists(outfolder):

os.mkdir(outfolder)

name_WGS_EPSRC1 = ['EPSRC1dna']

name_WGS_EPSRC2 = ['EPSRC2dna']

name_WGS_EPSRC4 = ['EPSRC4dna']

names_CTRL_EPSRC1_rna = ['EPSRC1rna_hapcaller','EPSRC1rna_samtools','EPSRC1rna_strelka']

names_CTRL_EPSRC2_rna = ['EPSRC2rna_hapcaller','EPSRC2rna_samtools','EPSRC2rna_strelka']

names_CTRL_EPSRC4_rna = ['EPSRC4rna_hapcaller','EPSRC4rna_samtools','EPSRC4rna_strelka']

path_rna = "/<path to>/scu_results/strelka_sc_max_all/"

names_CTRL_EPSRC1_atac = ['EPSRC1atac_hapcaller','EPSRC1atac_samtools','EPSRC1atac_strelka']

names_CTRL_EPSRC2_atac = ['EPSRC2atac_hapcaller','EPSRC2atac_samtools','EPSRC2atac_strelka']

names_CTRL_EPSRC4_atac = ['EPSRC4atac_hapcaller','EPSRC4atac_samtools','EPSRC4atac_strelka']

path_atac = "/<path to>/scu_results/strelka_sc_atac_max_all/"

EPSRC1_dict = {'name':'EPSRC1',

'names_WGS':name_WGS_EPSRC1,

'names_CTRL_rna':names_CTRL_EPSRC1_rna,

'names_CTRL_atac':names_CTRL_EPSRC1_atac,

'path_rna':path_rna,

'path_atac':path_atac}

EPSRC2_dict = {'name':'EPSRC2',

'names_WGS':name_WGS_EPSRC2,

'names_CTRL_rna':names_CTRL_EPSRC2_rna,

'names_CTRL_atac':names_CTRL_EPSRC2_atac,

'path_rna':path_rna,

'path_atac':path_atac}

EPSRC4_dict = {'name':'EPSRC4',

'names_WGS':name_WGS_EPSRC4,

'names_CTRL_rna':names_CTRL_EPSRC4_rna,

'names_CTRL_atac':names_CTRL_EPSRC4_atac,

'path_rna':path_rna,

'path_atac':path_atac}

sample_dict_list = [EPSRC1_dict, EPSRC2_dict, EPSRC4_dict]

min_alt_read_count_filter_dict = [{'min_alt_reads':i,'min_sc_qual':min_sc_qual_base} for i in min_alt_reads]

standard_filter_dict = [{'min_alt_reads':min_alt_reads_base,'min_sc_qual':min_sc_qual_base}]

iterate_compare_CTRL_variants_over_filter(sample_dict_list, min_alt_read_count_filter_dict, outfolder, 'min_alt_reads_filter_stats')

iterate_compare_CTRL_variants_over_filter(sample_dict_list, standard_filter_dict, outfolder, 'standard_filter_stats')

def count_overlap_CTRL():

outfolder = "/<path to>/compare_rna_atac_results/test"

min_vaf_base = 0.005

max_vaf_base = 1.0

min_vaf_WGS_base = 0.0

min_alt_count_WGS_base = 1

min_vafs = [0.0, 0.0005, 0.001, 0.005, 0.01, 0.05]

max_vafs = [1.0, 0.5, 0.4, 0.3, 0.2, 0.1, 0.05]

min_alt_count_base = 5

if not os.path.exists(outfolder):

os.mkdir(outfolder)

vardir_rna_EPSRC1 = "/<path to>/compare_rna_atac_results/CTRL_overlap_all/vartrix_rna/EPSRC1/"

vardir_rna_EPSRC2 = "/<path to>/compare_rna_atac_results/CTRL_overlap_all/vartrix_rna/EPSRC2/"

vardir_rna_EPSRC4 = "/<path to>/compare_rna_atac_results/CTRL_overlap_all/vartrix_rna/EPSRC4/"

vcfdir_rna_EPSRC1 = "/<path to>/compare_rna_atac_results/CTRL_overlap_all/vartrix_rna/EPSRC1/variants_CTRL_both.vcf"

vcfdir_rna_EPSRC2 = "/<path to>/compare_rna_atac_results/CTRL_overlap_all/vartrix_rna/EPSRC2/variants_CTRL_both.vcf"

vcfdir_rna_EPSRC4 = "/<path to>/compare_rna_atac_results/CTRL_overlap_all/vartrix_rna/EPSRC4/variants_CTRL_both.vcf"

vardir_atac_EPSRC1 = "/<path to>/compare_rna_atac_results/CTRL_overlap_all/vartrix_atac/EPSRC1/"

vardir_atac_EPSRC2 = "/<path to>/compare_rna_atac_results/CTRL_overlap_all/vartrix_atac/EPSRC2/"

vardir_atac_EPSRC4 = "/<path to>/compare_rna_atac_results/CTRL_overlap_all/vartrix_atac/EPSRC4/"

vcfdir_atac_EPSRC1 = "/<path to>/compare_rna_atac_results/CTRL_overlap_all/vartrix_atac/EPSRC1/variants_CTRL_both.vcf"

vcfdir_atac_EPSRC2 = "/<path to>/compare_rna_atac_results/CTRL_overlap_all/vartrix_atac/EPSRC2/variants_CTRL_both.vcf"

vcfdir_atac_EPSRC4 = "/<path to>/compare_rna_atac_results/CTRL_overlap_all/vartrix_atac/EPSRC4/variants_CTRL_both.vcf"

vardir_unique_rna_EPSRC1 = "/<path to>/compare_rna_atac_results/CTRL_overlap_all/vartrix_unique_rna/EPSRC1/"

vardir_unique_rna_EPSRC2 = "/<path to>/compare_rna_atac_results/CTRL_overlap_all/vartrix_unique_rna/EPSRC2/"

vardir_unique_rna_EPSRC4 = "/<path to>/compare_rna_atac_results/CTRL_overlap_all/vartrix_unique_rna/EPSRC4/"

vcfdir_unique_rna_EPSRC1 = "/<path to>/compare_rna_atac_results/CTRL_overlap_all/vartrix_unique_rna/EPSRC1/variants_CTRL_rna.vcf"

vcfdir_unique_rna_EPSRC2 = "/<path to>/compare_rna_atac_results/CTRL_overlap_all/vartrix_unique_rna/EPSRC2/variants_CTRL_rna.vcf"

vcfdir_unique_rna_EPSRC4 = "/<path to>/compare_rna_atac_results/CTRL_overlap_all/vartrix_unique_rna/EPSRC4/variants_CTRL_rna.vcf"

vardir_unique_atac_EPSRC1 = "/<path to>/compare_rna_atac_results/CTRL_overlap_all/vartrix_unique_atac/EPSRC1/"

vardir_unique_atac_EPSRC2 = "/<path to>/compare_rna_atac_results/CTRL_overlap_all/vartrix_unique_atac/EPSRC2/"

vardir_unique_atac_EPSRC4 = "/<path to>/compare_rna_atac_results/CTRL_overlap_all/vartrix_unique_atac/EPSRC4/"

vcfdir_unique_atac_EPSRC1 = "/<path to>/compare_rna_atac_results/CTRL_overlap_all/vartrix_unique_atac/EPSRC1/variants_CTRL_atac.vcf"

vcfdir_unique_atac_EPSRC2 = "/<path to>/compare_rna_atac_results/CTRL_overlap_all/vartrix_unique_atac/EPSRC2/variants_CTRL_atac.vcf"

vcfdir_unique_atac_EPSRC4 = "/<path to>/compare_rna_atac_results/CTRL_overlap_all/vartrix_unique_atac/EPSRC4/variants_CTRL_atac.vcf"

asedir_WGS_EPSRC1 = "/<path to>/compare_rna_atac_results/CTRL_overlap_all/vartrix_WGS/EPSRC1/counts.table"

asedir_WGS_EPSRC2 = "/<path to>/compare_rna_atac_results/CTRL_overlap_all/vartrix_WGS/EPSRC2/counts.table"

asedir_WGS_EPSRC4 = "/<path to>/compare_rna_atac_results/CTRL_overlap_all/vartrix_WGS/EPSRC4/counts.table"

EPSRC1_dict = {'name':'EPSRC1',

'vardir_rna':vardir_rna_EPSRC1,

'vcfdir_rna':vcfdir_rna_EPSRC1,

'vardir_atac':vardir_atac_EPSRC1,

'vcfdir_atac':vcfdir_atac_EPSRC1,

'vardir_unique_rna':vardir_unique_rna_EPSRC1,

'vcfdir_unique_rna':vcfdir_unique_rna_EPSRC1,

'vardir_unique_atac':vardir_unique_atac_EPSRC1,

'vcfdir_unique_atac':vcfdir_unique_atac_EPSRC1,

'asedir_WGS':asedir_WGS_EPSRC1}

EPSRC2_dict = {'name':'EPSRC2',

'vardir_rna':vardir_rna_EPSRC2,

'vcfdir_rna':vcfdir_rna_EPSRC2,

'vardir_atac':vardir_atac_EPSRC2,

'vcfdir_atac':vcfdir_atac_EPSRC2,

'vardir_unique_rna':vardir_unique_rna_EPSRC2,

'vcfdir_unique_rna':vcfdir_unique_rna_EPSRC2,

'vardir_unique_atac':vardir_unique_atac_EPSRC2,

'vcfdir_unique_atac':vcfdir_unique_atac_EPSRC2,

'asedir_WGS':asedir_WGS_EPSRC2}

EPSRC4_dict = {'name':'EPSRC4',

'vardir_rna':vardir_rna_EPSRC4,

'vcfdir_rna':vcfdir_rna_EPSRC4,

'vardir_atac':vardir_atac_EPSRC4,

'vcfdir_atac':vcfdir_atac_EPSRC4,

'vardir_unique_rna':vardir_unique_rna_EPSRC4,

'vcfdir_unique_rna':vcfdir_unique_rna_EPSRC4,

'vardir_unique_atac':vardir_unique_atac_EPSRC4,

'vcfdir_unique_atac':vcfdir_unique_atac_EPSRC4,

'asedir_WGS':asedir_WGS_EPSRC4}

sample_dict_list = [EPSRC1_dict, EPSRC2_dict, EPSRC4_dict]

min_vaf_filter_dict = [{'min_alt_count':min_alt_count_base,'min_vaf':i, 'max_vaf':max_vaf_base, 'min_alt_count_WGS':min_alt_count_WGS_base, 'min_vaf_WGS':min_vaf_WGS_base} for i in min_vafs]

max_vaf_filter_dict = [{'min_alt_count':min_alt_count_base,'min_vaf':min_vaf_base, 'max_vaf':i, 'min_alt_count_WGS':min_alt_count_WGS_base, 'min_vaf_WGS':min_vaf_WGS_base} for i in max_vafs]

standard_filter_dict = [{'min_alt_count':5,'min_vaf':min_vaf_base,'max_vaf':max_vaf_base, 'min_alt_count_WGS':min_alt_count_WGS_base, 'min_vaf_WGS':min_vaf_WGS_base}]

#iterate_count_overlap_vartrix(sample_dict_list, min_vaf_filter_dict, outfolder, 'min_vaf_filter', resume=True)

#iterate_count_overlap_vartrix(sample_dict_list, max_vaf_filter_dict, outfolder, 'max_vaf_filter', resume=True)

iterate_count_overlap_vartrix(sample_dict_list, standard_filter_dict, outfolder, 'standard_filters', resume=False)

def parse_args():

parser = argparse.ArgumentParser(description='Variant statistics analysis')

subparsers = parser.add_subparsers(dest='func')

pair_parser = subparsers.add_parser('process_pair')

pair_parser.add_argument('samples', help='path to sample json file')

pair_parser.add_argument('filters', help='path to filter json file')

pair_parser.add_argument('test_name', help='name of test (should be unique)')

pair_parser.add_argument('-r', '--resume', help='if specified, attempt to resume', action="store_true")

aggvtx_parser = subparsers.add_parser('aggregate_vartrix')

aggvtx_parser.add_argument('vartrix_dir', help='path to vartrix output folder')

aggvtx_parser.add_argument('vcf', help='path to variant vcf file used to generate vartrix output')

aggvtx_parser.add_argument('outcsv', help='path to resulting .csv file')

args = parser.parse_args()

return args

def main():

### Outdated approaches for processing overlaps

#process_WGS_v_scRNA()

#process_WGS_v_scATAC()

#process_WGS_v_bulk()

#process_scu()

#scu_stats()

#process_compare_CTRL_variants()

#count_overlap_CTRL()

#intersect_scu("/<path to>/scu_results/strelka_sc_atac_max_all/EPSRC1/variants_scu_50.tsv", "/<path to>/scu_results/hapcaller_sc_atac_max_all/EPSRC1/variants_scu_80.tsv", "/<path to>/scu_results/EPSRC1atac_scu_isec_50_80.tsv", vcfheader="/<path to>/scu_results/strelka_sc_atac_max_all/EPSRC1/sc_intermediaries/EPSRC1atac/header.txt")

#intersect_scu("/<path to>/scu_results/strelka_sc_atac_max_all/EPSRC2/variants_scu_50.tsv", "/<path to>/scu_results/hapcaller_sc_atac_max_all/EPSRC2/variants_scu_80.tsv", "/<path to>/scu_results/EPSRC2atac_scu_isec_50_80.tsv", vcfheader="/<path to>/scu_results/strelka_sc_atac_max_all/EPSRC2/sc_intermediaries/EPSRC2atac/header.txt")

#intersect_scu("/<path to>/scu_results/strelka_sc_atac_max_all/EPSRC4/variants_scu_50.tsv", "/<path to>/scu_results/hapcaller_sc_atac_max_all/EPSRC4/variants_scu_80.tsv", "/<path to>/scu_results/EPSRC4atac_scu_isec_50_80.tsv", vcfheader="/<path to>/scu_results/strelka_sc_atac_max_all/EPSRC4/sc_intermediaries/EPSRC4atac/header.txt")

#intersect_scu("/<path to>/scu_results/strelka_sc_atac_max_all/CTRL/variants_scu_50.tsv", "/<path to>/scu_results/hapcaller_sc_atac_max_all/CTRL/variants_scu_80.tsv", "/<path to>/scu_results/CTRLatac_scu_isec_50_80.tsv", vcfheader="/<path to>/scu_results/strelka_sc_atac_max_all/CTRL/sc_intermediaries/CTRLatac/header.txt")

### Approaches for Statistics on Single VCF ###

#mylist = [{'name':'EPSRC1','file':"/<path to>/WGS/EPSRC1dna/strelka_somatic/CTR1_somatic/somatic_annotated_pass_no_dbsnp.TUMOR.vcf"},

# {'name':'EPSRC2','file':"/<path to>/WGS/EPSRC2dna/strelka_somatic/CTR1_somatic/somatic_annotated_pass_no_dbsnp.TUMOR.vcf"},

# {'name':'EPSRC4','file':"/<path to>/WGS/EPSRC4dna/strelka_somatic/CTR1_somatic/somatic_annotated_pass_no_dbsnp.TUMOR.vcf"}]

#filter_and_overlap_multiple(mylist, "/<path to>/WGS/somatic_overlap_no_dbsnp.tsv")

#filter_single("/<path to>/WGS/EPSRC1dna/strelka_variants_somatic_candidates_annotated_no_dbsnp.TUMOR.vcf", "/<path to>/WGS/EPSRC1dna/strelka_variants_somatic_candidates_annotated_no_dbsnp.tsv")

#table = pd.read_csv("/<path to>/scu_results/scu_atac_40_100_stats/EPSRC1/vartrix_WGS_EPSRC1_counted.csv")

#table = table[table['alt_count'] >= 1]

#generate_vcf(table, "/<path to>/scu_results/strelka_sc_atac_max_all/EPSRC1/WGS_intermediaries/EPSRC1dna/header.txt", "/<path to>/scu_results/WGS_atac_sigprofiler/EPSRC1_WGS.vcf", atac=False)

#sc_counts = count_vartrix("/<path to>/scu_results/vartrix_counts_CTRL/CTRLrna/", "/<path to>/PTM_overlap/CTRL/CTRL.vcf")

#sc_counts.to_csv("/<path to>/PTM_overlap/CTRL/CTRL_counted.csv")

args = parse_args()

if args.func == 'process_pair':

process_WGS_v_sc(args.samples, args.filters, args.test_name, resume=args.resume)

elif args.func == 'aggregate_vartrix':

counts = count_vartrix(args.vartrix_dir, args.vcf)

total = len(counts)

counts['depth'] = counts['ref_count'] + counts['alt_count']

counts['vaf'] = counts['alt_count'] / counts['depth']

counts_with_depth = counts[counts['depth'] > 0]

print(f"{total} variants total, {total - len(counts_with_depth)} variants removed due to 0 depth, {len(counts_with_depth)} final")

counts_with_depth.to_csv(args.outcsv)

if __name__ == "__main__":

main()

# R

## cell_cycle.R

# taken from https://hbctraining.github.io/scRNA-seq/lessons/cell_cycle_scoring.html

# and genes from https://github.com/hbc/tinyatlas/blob/master/cell_cycle/Mus_musculus.csv

suppressPackageStartupMessages({

library(plyr)

library(dplyr)

library(Seurat)

library(RCurl)

library(AnnotationHub)

})

script.dir <- dirname(sys.frame(1)$ofile)

source(paste0(script.dir, "/seurat_RNA.R"))

# TODO: while the current approach works for RNA-seq, may need to take a differing approach with ATAC-seq to match ENSDB loci to peaks instead of by gene

## quickCycleTest

# generates a DimPlot for a set of genes linked to cell cycle for quick identification of cell populations undergoing mitosis

# suob: seurat object containing the relevant genes as activity features

quickCycleTest <- function(suob) {

X11()

p = FeaturePlot(suob, features = c("Pcna", "Top2a", "Mcm6", "Mki67"), ncol=3)

print(p)

}

## cellCycleAnnotate

# annotate cells with cell cycle stage information based on genes known to be highly associated with each stage of the cell cycle in Mus Musculus, with cycle stage annotations placed in the $Phase parameter

# suob: seurat object with activity levels in each of the relevant genes

cellCycleAnnotate <- function(suob, plot=TRUE) {

# for Mus Musculus

cc_file <- getURL("https://raw.githubusercontent.com/hbc/tinyatlas/master/cell_cycle/Mus_musculus.csv")

cell_cycle_genes <- read.csv(text = cc_file)

ah <- AnnotationHub()

ahDb <- query(ah, pattern = c("Mus musculus", "EnsDb"), ignore.case = TRUE)

id <- ahDb %>% mcols() %>% rownames() %>% tail(n = 1)

edb <- ah[[id]]

annotations <- genes(edb, return.type = "data.frame")

annotations <- annotations %>% dplyr::select(gene_id, gene_name, seq_name, gene_biotype, description)

cell_cycle_markers <- dplyr::left_join(cell_cycle_genes, annotations, by = c("geneID" = "gene_id"))

s_genes <- cell_cycle_markers %>% dplyr::filter(phase == "S") %>% pull("gene_name")

g2m_genes <- cell_cycle_markers %>% dplyr::filter(phase == "G2/M") %>% pull("gene_name")

suob <- CellCycleScoring(suob, g2m.features = g2m_genes, s.features = s_genes)

if (plot) {

X11()

p = DimPlot(suob, group.by = 'Phase')

print(p)

}

return(suob)

}

## regressCellCycle

# use cell cycle scores determined in cellCycleAnnotate to regress out factors associated with cell division so that these effects do not contribute to the clustering of expression level heterogeneity

# suob: seurat object with S.Score and G2M.Score attributes (as generated by cellCycleAnnotate)

# standard_filters: use standard seurat filters for PCA and clustering, or turn this off to enter them manually

# verbose: print extra figures

regressCellCycle <- function(suob, standard_filters=TRUE, verbose=FALSE, plot=TRUE) {

X11()

p = RidgePlot(suob, features = c("Pcna", "Top2a", "Mcm6", "Mki67"), ncol = 2, group.by = 'Phase')

print(p)

variablefeatures <- VariableFeatures(suob)

suob <- ScaleData(suob, vars.to.regress = c("S.Score", "G2M.Score"), features = variablefeatures)

num_dims <- 50

suob <- RunPCA(suob, features = VariableFeatures(object = suob), npcs = strtoi(num_dims, base = 0L))

print(suob[["pca"]], dims = 1:5, nfeatures = 5)

if(verbose) {

X11()

p = VizDimLoadings(suob, dims = 1:2, reduction = "pca")

print(p)

X11()

p = DimPlot(suob, reduction = "pca", group.by = "Phase")

print(p)

X11()

p = DimHeatmap(suob, dims = 1:15, cells = 500, balanced = TRUE, fast=FALSE)

print(p)

}

X11()

p = ElbowPlot(suob, ndims = 50)

print(p)

if(standard_filters) {

clu_dims <- 50

} else {

clu_dims <- typeline("Clustering: Enter number of PCA dims (consider elbow plot): ")

print(strtoi(clu_dims))

}

res <- 0.8

suob <- FindNeighbors(suob, dims = 1:strtoi(clu_dims, base = 0L))

suob <- FindClusters(suob, resolution = as.double(res))

head(Idents(suob), 5)

suob <- RunUMAP(suob, dims = 1:strtoi(clu_dims))

if (plot) {

X11()

p = DimPlot(suob, reduction="umap")

print(p)

}

return(suob)

}

## ptm_count.R

suppressPackageStartupMessages({

library(plyr)

library(dplyr)

library(prob)

library(stringr)

})

source("./seurat_RNA.R")

source("./seurat_mutations.R")

source("./cell_cycle.R")

## START ##

path.to.levels <- "/<redacted>/SRCdata/EpSRC/EpSRC_RNA_1_outs/filtered_gene_bc_matrices/genome/"

path.to.mut.matrices <- "/<redacted>/working/vartrix_counts_CTRL/EPSRC1rna/"

suob.rna <- ReadRNA(path.to.levels)

suob.mut <- ReadMut(path.to.mut.matrices)

suob.mut.meta <- read.table("/<redacted>/working/PTM_overlap/EPSRC1_counted.csv", header=TRUE, sep=",")

suob.mut.meta <- indexMutMetaUnder(suob.mut.meta)

suob.mut[["ALT"]] <- suob.mut[["ALT"]][which(rownames(suob.mut[["ALT"]]) %in% suob.mut.meta$index),]

suob.mut[["REF"]] <- suob.mut[["REF"]][which(rownames(suob.mut[["REF"]]) %in% suob.mut.meta$index),]

suob <- loadSeuratWithMutations(suob.rna, suob.mut, "EpSRCrna1")

## RNA PROCESSING ##

suob <- runSeuratRNA(suob, standard_filters=TRUE)

suob <- cellCycleAnnotate(suob)

suob <- regressCellCycle(suob)

## MUTATION PROCESSING

#suob.mut.matched.matched <- suob.mut.matched[,(colnames(suob.mut.matched) %in% colnames(suob))]

#suob[["MUT"]] <- CreateAssayObject(counts = suob.mut.matched.matched)

suob.mut.out <- as.data.frame(suob[["ALT"]]@counts)

suob.mut.final <- as.data.frame(suob.mut.out > 0)

suob.mut.final$Count <- rowSums(suob.mut.final)

suob.mut.final$Mean <- rowMeans(suob.mut.out)

suob.mut.filtered <- suob.mut.final[suob.mut.final$Count >= 10,]

suob.mut.filtered <- subset(suob.mut.filtered, select = -c(Count, Mean))

suob.mut.filtered.t <- as.data.frame(t(suob.mut.filtered))

suob.mut.filtered.t$Clusters <- Idents(suob)

cluster.counts <- aggregate(. ~ Clusters, suob.mut.filtered.t, sum)

cluster.counts <- as.data.frame(cluster.counts)

cluster.counts$Total <- (suob.mut.filtered.t %>% dplyr::filter(!is.na(Clusters)) %>% count(Clusters))$n

p.values <- list()

for (mut in colnames(cluster.counts[-which(names(cluster.counts) %in% c("Total","Columns", "Clusters"))]))

{

p.values[mut] <- chisq.test(data.frame(cluster.counts[which(names(cluster.counts) == mut)],cluster.counts$Total-cluster.counts[which(names(cluster.counts) == mut)]))$p.value

}

p.values <- t(as.data.frame(t(p.values)))

#p.values.filtered <- t(as.data.frame(t(p.values[p.values[,1] <= 10^-10,])))

p.values.filtered <- p.values

colnames(x=p.values.filtered) <- c("alt.p")

suob.mut.ref.out <- subset(t(as.data.frame(suob[["REF"]]@counts)), select=rownames(p.values))

suob.mut.ref.filtered.t <- as.data.frame(suob.mut.ref.out > 0)

suob.mut.ref.filtered.t$Clusters <- Idents(suob)

cluster.counts.ref <- aggregate(. ~ Clusters, suob.mut.ref.filtered.t, sum)

cluster.counts.ref <- as.data.frame(cluster.counts.ref)

p.values.ref <- list()

for (mut in colnames(cluster.counts[-which(names(cluster.counts) %in% c("Total","Columns", "Clusters"))]))

{

#p.values.ref[mut] <- chisq.test(data.frame(cluster.counts[which(names(cluster.counts) == mut)],cluster.counts.ref[which(names(cluster.counts.ref) == mut)]))$p.value

p.values.ref[mut] <- fisher.test(cbind(cluster.counts[which(names(cluster.counts) == mut)],cluster.counts.ref[which(names(cluster.counts.ref) == mut)]), workspace=1e+7, hybrid=TRUE)$p.value

}

p.values.ref <- t(as.data.frame(t(p.values.ref)))

colnames(x=p.values.ref) <- c("ref.p")

p.values.ref.filtered <- t(as.data.frame(t(p.values.ref[p.values.ref[,1] <= 0.1,])))

colnames(x=p.values.filtered) <- c("alt.p")

rownames(p.values.ref) <- gsub("-", "_", rownames(p.values.ref))

p.values.ref <- data.frame(p.values.ref)

p.values.ref$gene <- suob.mut.meta.copy[rownames(p.values.ref),]$gene

print(p.values.ref)

suob.mut.ref.out <- subset(t(as.data.frame(suob[["REF"]]@counts)), select=rownames(p.values))

suob.mut.ref.reads <- as.data.frame(suob.mut.ref.out)

suob.mut.ref.reads$Clusters <- Idents(suob)

cluster.counts.ref.reads <- aggregate(. ~ Clusters, suob.mut.ref.reads, sum)

cluster.counts.ref.reads <- as.data.frame(cluster.counts.ref.reads)

suob.mut.out <- subset(t(as.data.frame(suob[["ALT"]]@counts)), select=rownames(p.values))

suob.mut.reads <- as.data.frame(suob.mut.out)

suob.mut.reads$Clusters <- Idents(suob)

cluster.counts.reads <- aggregate(. ~ Clusters, suob.mut.reads, sum)

cluster.counts.reads <- as.data.frame(cluster.counts.reads)

cluster.counts.reads/cluster.counts[-which(names(cluster.counts) %in% c("Total"))]

cluster.counts.ref.reads/cluster.counts.ref

rownames(p.values.ref) <- gsub("-", "_", rownames(p.values.ref))

suob.mut.meta$ref.p <- data.frame(p.values.ref)[rownames(suob.mut[["ALT"]]),"ref.p"]

# TODO fix for case where length is zero, fix for case where length is one

i <- 0

while (i*9 < nrow(p.values.ref.filtered))

{

j <- min(c((i+1)*9, nrow(p.values.ref.filtered)))

print(i*9+1)

print(j)

X11()

p = FeaturePlot(suob, features = paste("alt_", rownames(p.values.ref.filtered)[(i*9+1):(j)], sep=""), ncol=3)

print(p)

i <- i + 1

}

i <- 0

while (i*9 < nrow(p.values.ref.filtered))

{

j <- min(c((i+1)*9, nrow(p.values.ref.filtered)))

print(i*9+1)

print(j)

X11()

p = FeaturePlot(suob, features = paste("ref_", rownames(p.values.ref.filtered)[(i*9+1):(j)], sep=""), ncol=3)

print(p)

i <- i + 1

}

# hold up on that filtering, you can also have the opposite direction (ie. low p value on ref, high p-value on alt) so you should be checking on this as well (this requires additional processing to get a separate list of filtered variants)

# consider moving to some form of differential expression, this will allow you to see which clusters are affected

typeline("Done, press enter to close")

## seurat_RNA.R

suppressPackageStartupMessages({

library(plyr)

library(dplyr)

library(Seurat)

library(patchwork)

})

### Utility Functions ###

## typeline

# take user input

# msg: message to display (prompt)

# output: text entered by user

typeline <- function(msg) {

if (interactive() ) {

txt <- readline(msg)

} else {

cat(msg);

txt <- readLines("stdin",n=1);

}

return(txt)

}

## userEnterList

# get list of entries from the user

# msg: messsage to display (prompt)

# output: text entered by user

userEnterList <- function(msg) {

if (interactive() ) {

EXP <- as.integer(strsplit(readline(msg), " ")[[1]])

} else {

cat(msg)

EXP <- as.integer(strsplit(readLines("stdin",n=1), " ")[[1]])

}

}

### identifyNormalRNAEP

# custom function for Epithelioid Sarcoma to enable the user to identify the normal cell populations in a sample based on expression of SmarcB1, Rgs5, and Pdgfra

# cells are labeled as tumor or normal and this label is stored in "tumNormLabels" in the seurat object

# suob: seurat object containing epithelioid sarcoma expression levels

# output: seurat object with labels

identifyNormalRNAEP <- function(suob) {

X11()

p <- FeaturePlot(suob, features = c("Pdgfra","Rgs5","Smarcb1"))

print(p)

normclusters <- userEnterList("enter the non-tumor clusters (space-separated list) \n")

suob$tumNormLabels <- ifelse(suob$seurat_clusters %in% normclusters, "normal", "tumor")

print("Identified normal cell clusters: ", normclusters)

return(suob)

}

### Major Functionality ###

## ReadRNA

# wrapper for reading 10X genomics library into seurat

# path.to.levels: path to output of 10X cellranger containing matrix.mtx, barcodes.tsv, features.tsv, and genes.tsv (usually located in filtered_gene_bc_matrices/genome/)

# output: seurat object

ReadRNA <- function(path.to.levels) {

suob.rna <- Read10X(data.dir = path.to.levels)

return(suob.rna)

}

### TODO: depreciate runSeuratRNA, move all preprocessing steps into filterScaleRNA, make new function that performs only the PCA and clustering (or one that only does PCA, and only does clustering, better options when replacing reduction)

## runSeuratRNA

# runs the standard seurat RNA filtering/clustering pipeline, generating relevant plots along the way

# suob: seurat object

# verbose: if TRUE, prints full set of figures with more details

# standard_filters: if FALSE, prompts user for filter values and clustering hyperparameters, otherwise uses standard values selected based on experience (if not sure, leave as false)

# usevariablefeatures: set to true causes the scaling of data using only variable features, false will use all genes

# outputs: seurat object which has been filtered, dimensionally reduced, and clustered

runSeuratRNA <- function(suob, verbose=FALSE, standard_filters=FALSE, usevariablefeatures = TRUE) {

suob[["percent.mt"]] <- PercentageFeatureSet(suob, pattern = "^mt-")

X11()

p = VlnPlot(suob, features = c("nFeature_RNA", "nCount_RNA", "percent.mt"), ncol=3)

print(p)

X11()

plot1 <- FeatureScatter(suob, feature1 = "nCount_RNA", feature2 = "percent.mt")

plot2 <- FeatureScatter(suob, feature1 = "nCount_RNA", feature2 = "nFeature_RNA")

p = plot1 + plot2

print(p)

if(standard_filters) {

mtcutoff <- 10

nfeatmin <- 3000

nfeatmax <- 8000

ncountmin <- 8000

} else {

mtcutoff <- typeline("Filtering: Enter value of mt-percent cutoff (default = 5): ")

print(strtoi(mtcutoff, base = 0L))

nfeatmin <- typeline("Filtering: Enter minimum features (default = 200): ")

print(strtoi(nfeatmin, base = 0L))

nfeatmax <- typeline("Filtering: Enter maximum features: ")

print(strtoi(nfeatmax, base = 0L))

ncountmin <- typeline("Filtering: Enter minimum count: ")

print(strtoi(ncountmin, base = 0L))

}

old.cell.count <- ncol(suob[["RNA"]]@counts)

suob <- subset(suob, subset = nFeature_RNA > strtoi(nfeatmin, base = 0L) & nFeature_RNA < strtoi(nfeatmax, base = 0L) & percent.mt < strtoi(mtcutoff, base = 0L)& nCount_RNA > strtoi(ncountmin, base = 0L))

filtered.cell.count <- ncol(suob[["RNA"]]@counts)

cat("Cells before filtering: ", old.cell.count)

cat("Cells after filtering: ", filtered.cell.count)

X11()

p = VlnPlot(suob, features = c("nFeature_RNA", "nCount_RNA", "percent.mt"), ncol=3)

print(p)

suob <- NormalizeData(suob)

suob <- FindVariableFeatures(suob, selection.method = "vst", nfeatures = 2000)

top10 <- head(VariableFeatures(suob), 10)

if(verbose) {

X11()

par(mfrow=c(1,2))

plot1 = VariableFeaturePlot(suob)

p = LabelPoints(plot = plot1, points = top10, repel = TRUE)

print(p)

}

if(usevariablefeatures) {

genes <- VariableFeatures(suob)

} else {

genes <- rownames(suob)

}

suob <- ScaleData(suob, features = genes)

#num_dims <- typeline("PCA: Enter number PCA dimensions (default = 50): ")

num_dims <- 50

suob <- RunPCA(suob, features = VariableFeatures(object = suob), npcs = strtoi(num_dims, base = 0L))

print(suob[["pca"]], dims = 1:5, nfeatures = 5)

if(verbose) {

X11()

p = VizDimLoadings(suob, dims = 1:2, reduction = "pca")

print(p)

X11()

p = DimPlot(suob, reduction = "pca")

print(p)

X11()

p = DimHeatmap(suob, dims = 1:15, cells = 500, balanced = TRUE, fast=FALSE)

print(p)

}

X11()

p = ElbowPlot(suob, ndims = 50)

print(p)

if(standard_filters) {

clu_dims <- 50

} else {

clu_dims <- typeline("Clustering: Enter number of PCA dims (consider elbow plot): ")

print(strtoi(clu_dims))

}

#res <- typeline("Clustering: Enter resolution (between 0.4-1.2, higher for larger datasets): ")

#as.double(res)

res <- 0.8

suob <- FindNeighbors(suob, dims = 1:strtoi(clu_dims, base = 0L))

suob <- FindClusters(suob, resolution = as.double(res))

head(Idents(suob), 5)

#map <- typeline("What map to use? (enter umap or tsne): ")

map <- "umap"

if (map == "umap") {

suob <- RunUMAP(suob, dims = 1:strtoi(clu_dims))

X11()

p = DimPlot(suob, reduction="umap")

print(p)

} else if (map == "tsne") {

suob <- RunTSNE(suob, dims.use = 1:strtoi(clu_dims))

X11()

p = DimPlot(suob, reduction="tsne")

print(p)

}

return(suob)

}

## reclusterSeuratRNA

# runs seurat findclusters with louvain to regenerate clusters (and corresponding Idents of seurat object), meant to enable re-clustering at a finer or more granular resolution to control the number of clusters

# suob: seurat object

# res: resolution, required, default for runSeuratRNA is 0.8

# plot: generate a umap dimplot with the new clusters

# outputs: seurat object which has been reclustered

reclusterSeuratRNA <- function(suob, res, plot=TRUE) {

suob <- FindClusters(object = suob, resolution = as.double(res))

if (plot) {

X11()

p = DimPlot(suob, reduction="umap")

print(p)

}

return(suob)

}

## subsetSeuratRNA

# subset a seurat object with a specific list of genes and then re-cluster explicitly for those genes

# suob: seurat object

# genes: list of genes to keep

# res: resolution, required, default for runSeuratRNA is 0.8

# plot: generate a umap dimplot with the new clusters

# verbose: generate elbowplot for new PCA

subsetSeuratRNA <- function(suob, genes, res, plot=TRUE, verbose=FALSE) {

suob.subset <- subset(suob, features = genes)

suob.subset <- NormalizeData(suob.subset)

all.genes <- rownames(suob.subset)

suob.subset <- ScaleData(suob.subset, features = all.genes)

suob.subset <- RunPCA(suob.subset, features = all.genes)

if (verbose) {

X11()

p = ElbowPlot(suob.subset)

print(p)

}

suob.subset <- FindNeighbors(suob.subset, dims = 1:length(suob.subset@reductions$pca))

suob.subset <- FindClusters(suob.subset, resolution = res)

suob.subset <- RunUMAP(suob.subset, dims = 1:length(suob.subset@reductions$pca))

if (plot) {

X11()

p = DimPlot(suob.subset, reduction="umap")

print(p)

}

return(suob.subset)

}

### TODO: add description

filterScaleRNA <- function(suob, verbose=FALSE, standard_filters=FALSE, usevariablefeatures = TRUE, nvarfeatures = 2000) {

suob[["percent.mt"]] <- PercentageFeatureSet(suob, pattern = "^mt-")

X11()

p = VlnPlot(suob, features = c("nFeature_RNA", "nCount_RNA", "percent.mt"), ncol=3)

print(p)

X11()

plot1 <- FeatureScatter(suob, feature1 = "nCount_RNA", feature2 = "percent.mt")

plot2 <- FeatureScatter(suob, feature1 = "nCount_RNA", feature2 = "nFeature_RNA")

p = plot1 + plot2

print(p)

if(standard_filters) {

mtcutoff <- 10

nfeatmin <- 3000

nfeatmax <- 8000

ncountmin <- 8000

} else {

mtcutoff <- typeline("Filtering: Enter value of mt-percent cutoff (default = 5): ")

print(strtoi(mtcutoff, base = 0L))

nfeatmin <- typeline("Filtering: Enter minimum features (default = 200): ")

print(strtoi(nfeatmin, base = 0L))

nfeatmax <- typeline("Filtering: Enter maximum features: ")

print(strtoi(nfeatmax, base = 0L))

ncountmin <- typeline("Filtering: Enter minimum count: ")

print(strtoi(ncountmin, base = 0L))

}

old.cell.count <- ncol(suob[["RNA"]]@counts)

suob <- subset(suob, subset = nFeature_RNA > strtoi(nfeatmin, base = 0L) & nFeature_RNA < strtoi(nfeatmax, base = 0L) & percent.mt < strtoi(mtcutoff, base = 0L)& nCount_RNA > strtoi(ncountmin, base = 0L))

filtered.cell.count <- ncol(suob[["RNA"]]@counts)

cat("Cells before filtering: ", old.cell.count)

cat("Cells after filtering: ", filtered.cell.count)

X11()

p = VlnPlot(suob, features = c("nFeature_RNA", "nCount_RNA", "percent.mt"), ncol=3)

print(p)

suob <- NormalizeData(suob)

### How much difference does nfeatures make on the outcome of clustering (?!)

suob <- FindVariableFeatures(suob, selection.method = "vst", nfeatures = nvarfeatures)

top10 <- head(VariableFeatures(suob), 10)

if(verbose) {

X11()

par(mfrow=c(1,2))

plot1 = VariableFeaturePlot(suob)

p = LabelPoints(plot = plot1, points = top10, repel = TRUE)

print(p)

}

if(usevariablefeatures) {

genes <- VariableFeatures(suob)

} else {

genes <- rownames(suob)

}

suob <- ScaleData(suob, features = genes)

return(suob)

}

## seurat_mutations.R

suppressPackageStartupMessages({

library(plyr)

library(dplyr)

library(Seurat)

library(patchwork)

library(Matrix)

library(hdf5r)

library(Signac)

library(EnsDb.Mmusculus.v79)

})

### TODO ###

# - review mutation naming scheme, may wish to switch it from X1-110054321 to something like chr1-110054321 which makes much more sense, and also consider making it back to 1 indexing for better compatibility with VCF files later on

### Helper Functions ###

## indexMutMeta

# add an index field that contains mutation names which are compatible with those typically generated by ReadMut

indexMutMeta <- function(suob.mut.meta) {

suob.mut.meta$index <- paste0("X", suob.mut.meta$chromosome, "-", (suob.mut.meta$position-1)) # the subtraction is only done because vartrix operates in 0-indexing whereas the original vcfs are in 1-indexing

return(suob.mut.meta)

}

indexMutMetaUnder <- function(suob.mut.meta) {

suob.mut.meta$index <- paste0("X", suob.mut.meta$chromosome, "_", (suob.mut.meta$position-1)) # the subtraction is only done because vartrix operates in 0-indexing whereas the original vcfs are in 1-indexing

return(suob.mut.meta)

}

### Major Functionality ###

## ReadMut

# Reads a mutation matrix generated by run_vartrix.sh into an object of ALT and REF allele counts

# path.to.directory: the location of the directory output by vartrix containing alt_matrix.mtx, ref_matrix.mtx, variants.tsv, and barcodes.tsv

ReadMut <- function(path.to.directory) {

path_to_alt_variants <- paste(path.to.directory, "/alt_matrix.mtx", sep="")

path_to_ref_variants <- paste(path.to.directory, "/ref_matrix.mtx", sep="")

path_to_variant_list <- paste(path.to.directory, "/variants.tsv", sep="")

path_to_cell_list <- paste(path.to.directory, "/barcodes.tsv", sep="")

mut.varnames <- readLines(con = path_to_variant_list)

mut.varnames <- str_remove(mut.varnames, "chr")

mut.varnames <- paste0("X", mut.varnames)

mut.varnames <- make.names(mut.varnames, unique=TRUE)

mut.cellnames <- readLines(con = path_to_cell_list)

mut.alt <- readMM(file = path_to_alt_variants)

rownames(x = mut.alt) <- mut.varnames

colnames(x = mut.alt) <- mut.cellnames

mut.ref <- readMM(file = path_to_ref_variants)

rownames(x = mut.ref) <- mut.varnames

colnames(x = mut.ref) <- mut.cellnames

mut <- list()

mut[["ALT"]] <- mut.alt

mut[["REF"]] <- mut.ref

return(mut)

}

## loadSeuratWithMutations

# loads the REF-allele and ALT-allele matrices into the seurat object as assays "REF" and "ALT" respectively, preserving the "RNA" assay, and creates two new assays "ALTB" and "REFB" which are binary representations of whether the allele is present in a cell in any capacity

# note: this function makes sure that the cells within the RNA seurat object match those within the mutation matrices, and only keeps those which match (if no cell filtering was done during the mutation counting step, then the agreement between the two should be unanimous)

# suob.rna: a suob object of an RNA assay (e.g. generated by ReadRNA)

# suob.mut: a mutation object generated by ReadMut

# projectname: the name of the project to be used

# output: a seurat object with assays "RNA", "REF", "ALT", "REFB", and "ALTB"

loadSeuratWithMutations <- function(suob.rna, suob.mut, projectname, atac=FALSE) {

suob.rna.matched <- suob.rna[,(colnames(suob.rna) %in% colnames(suob.mut[["ALT"]]))]

suob.mut.alt.matched <- suob.mut[["ALT"]][,(colnames(suob.mut[["ALT"]]) %in% colnames(suob.rna))]

suob.mut.ref.matched <- suob.mut[["REF"]][,(colnames(suob.mut[["REF"]]) %in% colnames(suob.rna))]

cat("Expression Cells before filtering: ", ncol(suob.rna), "\n")

cat("Mutation Cells before filtering: ", ncol(suob.mut[["ALT"]]), "\n")

cat("Expression Cells before filtering: ", ncol(suob.rna.matched), "\n")

cat("Mutation Cells before filtering: ", ncol(suob.mut.alt.matched), "\n")

if (atac) {

assay <- CreateChromatinAssay(counts = suob.rna.matched, sep = c(":", "-"), project = projectname)

suob <- CreateSeuratObject(counts = assay, assay = "peaks")

} else {

suob <- CreateSeuratObject(counts = suob.rna.matched, project = projectname)

}

suob[["ALT"]] <- CreateAssayObject(counts = suob.mut.alt.matched)

suob[["REF"]] <- CreateAssayObject(counts = suob.mut.ref.matched)

suob[["ALTB"]] <- CreateAssayObject(counts = as.data.frame(suob.mut.alt.matched > 0))

suob[["REFB"]] <- CreateAssayObject(counts = as.data.frame(suob.mut.ref.matched > 0))

suob.mut.vaf <- suob.mut.alt.matched/(suob.mut.ref.matched+suob.mut.alt.matched)

suob.mut.vaf[is.na(suob.mut.vaf)] <- 0

suob[["VAF"]] <- CreateAssayObject(counts = suob.mut.vaf)

return(suob)

}

## loadSeuratATACWithMutations

# creates the seurat ATAC object and loads the REF-allele and ALT-allele matrices into that object as assays "REF" and "ALT" respectively, preserving the "ATAC" assay, and creates two new assays "ALTB" and "REFB" which are binary representations of whether the allele is present in a cell in any capacity

# note: replaces ReadATAC due to the need to filter the metadata file after checking to make sure that the cells within the RNA seurat object match those within the mutation matrices, only keeping those which match (if no cell filtering was done during the mutation counting step, then the agreement between the two should be unanimous)

# path.to.peaks: path to peaks output of 10X cellranger (usually filtered_peak_bc_matrix.h5)

# path.to.metadata: path to metadata of cells output from cellranger (usually singlecell.csv)

# path.to.fragments: path to compressed fragments file output from cellranger (usually fragments.tsv.gz)

# suob.mut: a mutation object generated by ReadMut

# projectname: the name of the project to be used

# output: a seurat object with assays "ATAC", "REF", "ALT", "REFB", and "ALTB"

loadSeuratATACWithMutations <- function(path.to.peaks, path.to.metadata, path.to.fragments, suob.mut, projectname) {

counts <- Read10X_h5(filename = path.to.peaks)

metadata <- read.csv(file = path.to.metadata, header = TRUE, row.names = 1)

counts.matched <- counts[,(colnames(counts) %in% colnames(suob.mut[["ALT"]]))]

metadata.matched <- metadata[(rownames(metadata) %in% colnames(suob.mut[["ALT"]])),]

suob.mut.alt.matched <- suob.mut[["ALT"]][,(colnames(suob.mut[["ALT"]]) %in% colnames(counts))]

suob.mut.ref.matched <- suob.mut[["REF"]][,(colnames(suob.mut[["REF"]]) %in% colnames(counts))]

cat("Peak Cells before filtering: ", ncol(counts), "\n")

cat("Mutation Cells before filtering: ", ncol(suob.mut[["ALT"]]), "\n")

cat("Peak Cells after filtering: ", ncol(counts.matched), "\n")

cat("Mutation Cells after filtering: ", ncol(suob.mut.alt.matched), "\n")

chrom_assay <- CreateChromatinAssay(counts = counts.matched, sep = c(":", "-"), genome = 'mm10', fragments = path.to.fragments)

suob <- CreateSeuratObject(counts = chrom_assay, assay = "PEAK", meta.data = metadata.matched)

annotations <- GetGRangesFromEnsDb(ensdb = EnsDb.Mmusculus.v79)

seqlevelsStyle(annotations) <- 'UCSC'

genome(annotations) <- "mm10"

Annotation(suob) <- annotations

suob[["ALT"]] <- CreateAssayObject(counts = suob.mut.alt.matched)

suob[["REF"]] <- CreateAssayObject(counts = suob.mut.ref.matched)

suob[["ALTB"]] <- CreateAssayObject(counts = as.data.frame(suob.mut.alt.matched > 0))

suob[["REFB"]] <- CreateAssayObject(counts = as.data.frame(suob.mut.ref.matched > 0))

suob.mut.vaf <- suob.mut.alt.matched/(suob.mut.ref.matched+suob.mut.alt.matched)

suob.mut.vaf[is.na(suob.mut.vaf)] <- 0

suob[["VAF"]] <- CreateAssayObject(counts = suob.mut.vaf)

return(suob)

}

# examples

## wgs_v_rna_sccaller_data.json

{

"samples":

[

{

"name":"EPSRC1",

"list_WGS":"/<path to>/WGS/EPSRC1dna/cell_list_consensus.txt",

"name_WGS":"EPSRC1dna",

"list_sc":"/<path to>/EPSRC_splits/EpSRCrna1/cell_list_sccaller.txt",

"name_sc":"EPSRC1rna",

"vartrix":"/<path to>/vartrix_WGS_sc_counts_consensus/EPSRC1rna_all_WGS_in_sc_counts/",

"full_vcf":"/<path to>/WGS/EPSRC1dna/variants_consensus/pseudo_cell/consensus3.vcf.gz"

},

{

"name":"EPSRC2",

"list_WGS":"/<path to>/WGS/EPSRC2dna/cell_list_consensus.txt",

"name_WGS":"EPSRC2dna",

"list_sc":"/<path to>/EPSRC_splits/EpSRCrna2/cell_list_sccaller.txt",

"name_sc":"EPSRC2rna",

"vartrix":"/<path to>/vartrix_WGS_sc_counts_consensus/EPSRC2rna_all_WGS_in_sc_counts/",

"full_vcf":"/<path to>/WGS/EPSRC2dna/variants_consensus/pseudo_cell/consensus3.vcf.gz"

},

{

"name":"EPSRC4",

"list_WGS":"/<path to>/WGS/EPSRC4dna/cell_list_consensus.txt",

"name_WGS":"EPSRC4dna",

"list_sc":"/<path to>/EPSRC_splits/EpSRCrna4/cell_list_sccaller.txt",

"name_sc":"EPSRC4rna",

"vartrix":"/<path to>/vartrix_WGS_sc_counts_consensus/EPSRC4rna_all_WGS_in_sc_counts/",

"full_vcf":"/<path to>/WGS/EPSRC4dna/variants_consensus/pseudo_cell/consensus3.vcf.gz"

}

],

"working": "/<path to>/sc_benchmark_results/WGS_hapcaller_sc_max_rna_exonic_overlap_all/"

}

## wgs_v_sc_exonic_vaf_filters.json

{

"base":

{

"min_cell_count":0.0,

"min_alt_reads":0.0,

"min_cell_vaf_factor":0.0,

"min_sc_qual":0.0,

"min_vaf":0.01,

"min_coverage": 1

},

"iterables":

{

"min_vaf":[0.0, 0.01, 0.02, 0.04, 0.08, 0.12, 0.16, 0.24, 0.32, 0.4, 0.5, 0.6, 0.7, 0.8, 0.9, 1.0]

},

"is_bulk": false,

"exonic": true,

"save_variants": false

}

## wgs_v_sc_non_exonic_filters.json

{

"base":

{

"min_cell_count":0.0,

"min_alt_reads":0.0,

"min_cell_vaf_factor":0.0,

"min_sc_qual":0.0,

"min_vaf":0.01,

"min_coverage": 1

},

"iterables":

{

"min_alt_reads":[0, 1, 2, 3, 4, 5, 6, 7, 8, 9, 10, 15, 20, 25, 30, 40, 50, 100, 200, 300, 400, 500],

"min_sc_qual":[0.0, 1.0, 2.0, 3.0, 4.0, 5.0, 6.0, 7.0, 8.0, 9.0, 10.0, 15.0, 20.0, 25.0, 30.0, 35.0, 40.0, 45.0, 50.0, 60.0, 70.0, 80.0, 90.0, 100.0, 150.0, 200.0]

},

"is_bulk": false,

"exonic": false,

"save_variants": false

}

# scripts

## count_vartrix.py

import os

import argparse

import csv

import allel

import numpy as np

import pandas as pd

import warnings

def parse_args():

parser = argparse.ArgumentParser(description='Count vartrix entries.')

parser.add_argument('vartrixdir', help='path to directory containing vartrix files (alt_matrix.mtx, ref_matrix.mtx, variants.tsv)')

parser.add_argument('vcf', help='VCF file corresponding to the vartrix call')

parser.add_argument('out', help='Output file')

args = parser.parse_args()

return args

def count_vartrix(vardir, vcfdir):

variants = os.path.join(vardir, "variants.tsv")

ref_mtx = os.path.join(vardir, "ref_matrix.mtx")

alt_mtx = os.path.join(vardir, "alt_matrix.mtx")

variant_list = []

chromosomes_vartrix = set()

with open(variants) as f:

tsvreader = csv.reader(f)

for row in tsvreader:

variant_name = row[0]

if 'chr' in variant_name:

variant_name = variant_name.split('chr')[1]

variant_list.append(variant_name)

chromosomes_vartrix.add('_'.join(variant_name.split('_')[0:-1]))

cell_list = [set() for _ in range(len(variant_list))]

ref_list = np.zeros(len(variant_list))

with open(ref_mtx) as f:

for i, line in enumerate(f.readlines()):

if i < 3:

continue

entry = line.split(' ')

ref_list[int(entry[0])-1] = ref_list[int(entry[0])-1] + int(entry[2])

if int(entry[2]) > 0:

cell_list[int(entry[0])-1].add(int(entry[1]))

alt_list = np.zeros(len(variant_list))

with open(alt_mtx) as f:

for i, line in enumerate(f.readlines()):

if i < 3:

continue

entry = line.split(' ')

alt_list[int(entry[0])-1] = alt_list[int(entry[0])-1] + int(entry[2])

if int(entry[2]) > 0:

cell_list[int(entry[0])-1].add(int(entry[1]))

gt_variants = allel.vcf_to_dataframe(vcfdir, fields='*', alt_number=1)

chromosomes = list(gt_variants['CHROM'])

missing_chr = []

for chrom in list(chromosomes_vartrix):

if not chrom in chromosomes:

missing_chr.append(chrom)

if len(missing_chr) > 0:

print("### WARNING: Chromosomes {} not found in vcf file, will ignore".format(missing_chr))

# make sure chromosome namings are compatible

for i, chromosome in enumerate(chromosomes):

if 'chr' in chromosome:

chromosome_split = chromosome.split('chr')[1]

chromosomes[i] = chromosome_split

positions = list(gt_variants['POS'])

ref_alleles = list(gt_variants['REF'])

alt_alleles = list(gt_variants['ALT'])

map_ind = {str(chromosome) + '_' + str(int(position)-1):i for i, (chromosome, position) in enumerate(zip(chromosomes, positions))}

entries = []

for variant in variant_list:

try:

index = map_ind[variant]

except KeyError:

continue

loci = str(chromosomes[index]) + ':' + str(positions[index]) + ':' + str(ref_alleles[index]) + '->' + str(alt_alleles[index])

allele = str(ref_alleles[index]) + '->' + str(alt_alleles[index])

entry = {'map':loci, 'chromosome':str(chromosomes[index]), 'position':str(positions[index]), 'allele':allele, 'ref_count':ref_list[index], 'alt_count':alt_list[index], 'count':len(cell_list[index])}

entries.append(entry)

counts = pd.DataFrame(entries)

return counts

def main():

args = parse_args()

vardir = args.vartrixdir

vcfdir = args.vcf

outfile = args.out

counts = count_vartrix(vardir, vcfdir)

counts.to_csv(outfile, sep='\t', index=False)

if __name__ == "__main__":

main()

## split_script.py

# samtools sort -l 0 -t "CB" -O sam -o test.sam -@ 24 /<redacted>/SRCdata/SRC1rna_outs/possorted_genome_bam.bam

import os

import sys

import getopt

import fileinput

import math

import numpy as np

import pysam as ps

import pandas as pd

from collections import defaultdict

def print_to_file(current_tag, out_dir, samfile, read_list):

name = current_tag.split('_')[0]

outfile=out_dir+"/"+name+".bam"

outbam = ps.AlignmentFile(outfile, "wb", template=samfile)

for item in read_list:

outbam.write(item)

outbam.close()

argv = sys.argv[1:]

n_cells = "0"

sam_file_path = ""

barcode_file_path = ""

out_dir = ""

try:

opts, args = getopt.getopt(argv,"b:c:o:")

except getopt.GetoptError:

print("split_script4.py -b <path/to/bamfile.bam> -c <path/to/barcodes.tsv> -o <path/to/outfolder>")

sys.exit(2)

for opt, arg in opts:

if opt == "-c":

barcode_file_path = arg

elif opt == "-o":

out_dir = arg

elif opt == "-b":

sam_file_path = arg

if sam_file_path == "":

sys.exit("Missing bam_file, use -b option")

if barcode_file_path == "":

sys.exit("Missing barcode_file, use -c option")

if out_dir == "":

sys.exit("Missing out_dir, use -o option")

print(ps.__file__)

print(ps.__version__)

barcode_df = pd.read_csv(barcode_file_path, header=None, sep='\t')

barcodes = barcode_df.iloc[:,0].tolist()

samfile = ps.AlignmentFile(sam_file_path, "rb")

#print(samfile.lengths())

missed = 0

bad = 0

b = "finished " + str(0) + " million entries"

sys.stdout.write(b)

sys.stdout.flush()

current_tag = None

read_count = 0

cell_count = 0

read_list = []

for idx,read in enumerate(samfile.fetch(until_eof=True)):

try:

tag = read.get_tag("CB", with_value_type=False)

except KeyError:

bad = bad + 1

continue

if not (tag == current_tag):

if (current_tag is not None):

if (current_tag in barcodes):

print_to_file(current_tag, out_dir, samfile, read_list)

cell_count = cell_count + 1

else:

missed = missed + read_count

read_list = []

current_tag = tag

read_count = 0

read_list.append(read)

read_count = read_count + 1

if idx%10000000 == 0:

sys.stdout.write("\b" * len(b))

b = "finished " + str(idx//1000000) + " million entries"

sys.stdout.write(b)

sys.stdout.flush()

samfile.close()

print("\n", str(cell_count), " cells were found")

print(str(missed), " entries were from low cell count cells and were not included")

print(str(bad), " entries did not have a CB tag and were not included")

# sh

## post_process.sh

#!/bin/bash

# run with source /path/to/post_process.sh <working_dir> /path/to/snpeff <njobs>

# where working dir is location of folder containing variants folder

# working should not include forward slash on last character

# snpeff should not include forward slash on last character

# running on 50 cores for 9200 cells will take approximately 5 hours

run_snpEff () {

# $1 snpEff_path

# $2 reference

# $3 vcf_dir

java -jar ${1}/snpEff.jar -c ${1}/snpEff.config -s ${3}/snpEff_summary.html $2 ${3}/variants.vcf > ${3}/annotated.vcf

}

# first step run snpEff

export -f run_snpEff

declare -a working=$1

declare -a reference="GRCm38.86"

declare -a snpEff_path=$2

declare -a njobs=$3

ls -d ${working}/variants/*/ | tr "\t" "\n" | parallel --gnu --jobs $njobs run_snpEff $snpEff_path $reference {}

ls -d ${working}/variants/*/ | tr "\t" "\n" > ${working}/cell_list.txt

# TODO - consider implementing --nostats and -t options to improve speedup, see manual <http://snpeff.sourceforge.net/SnpEff_manual.html>

## run_sccaller.sh

#!/bin/bash

declare -a sc_path="${1}"

declare -a working="${2}"

declare -a reference="${3}"

declare -a path_to_file="${4}"

declare -a nparjobs="${5}"

declare -a bulk_vcf="${working}/bulk_variants/variants.vcf"

declare -a outf=$(basename "$path_to_file" | cut -d "." -f 1)

mkdir ${working}/sc_variants2/${outf}

python2.7 $sc_path si --bam $path_to_file --fasta $reference --output ${working}/sc_variants2/${outf}/variants.vcf --snp_type hsnp --snp_in $bulk_vcf --cpu_num $nparjobs --min_depth 5 --minvar 1 --engine samtools > /dev/null

## run_snpeff.sh

#!/bin/bash

# run with ./path/to/run_snpeff.sh /path/to/snpeff_dir <path_to_vcf_file>

# where working dir is location of folder containing variants folder

# snpeff should not include forward slash on last character

set -e

declare -a snpEff_path=$1

declare -a infile=$2

declare -a reference="GRCm38.86"

declare outpath="$(dirname "${infile}")"

java -jar ${snpEff_path}/snpEff.jar -c ${snpEff_path}/snpEff.config -s ${snpEff_path}/snpEff_summary.html $reference $infile > "${outpath}/annotated.vcf"

## run_strelka.sh

#!/bin/bash

# options can be specified and passed to strelka, such as --exome or --rna or --min-qscore=20

declare -a options=$1

declare -a inf=$2

declare -a working=$3

declare -a temp=$4

declare -a reference=$5

declare -a njobs=$6

declare -a outf=$(basename "$inf" | cut -d "." -f 1)

mkdir "${temp}/strelka_temp/${outf}"

configureStrelkaGermlineWorkflow.py $options --bam $inf --referenceFasta $reference --runDir ${temp}/strelka_temp/${outf} > /dev/null

${temp}/strelka_temp/${outf}/runWorkflow.py -m local -j $njobs > /dev/null 2> /dev/null

mkdir ${working}/variants/${outf}

mv ${temp}/strelka_temp/${outf}/results/variants/* ${working}/variants/${outf}/

rm -r ${temp}/strelka_temp/${outf}/

## run_vartrix.sh

#!/bin/bash

# run with /path/to/run_vartrix.sh /path/to/vcf.vcf /path/to/metadata.tsv /path/to/bam.bam /path/to/barcodes.tsv /path/to/ref.fa /path/to/outdir <atac or rna> nthreads

declare -a vcf="${1}"

declare -a meta="${2}"

declare -a bam="${3}"

declare -a barcode="${4}"

declare -a ref="${5}"

declare -a outdir="${6}"

declare -a rna_opt="${7}"

declare -a nthreads="${8}"

export PATH=/<redacted>/bin/vartrix-1.1.16:$PATH

mkdir $outdir

cp $barcode ${outdir}/

if [ "$rna_opt" == "rna" ]; then

vartrix_linux -v $vcf -b $bam -f $ref -s coverage --out-variants ${outdir}/variants.tsv --ref-matrix ${outdir}/ref_matrix.mtx --out-matrix ${outdir}/alt_matrix.mtx -c $barcode --threads $nthreads --mapq 10 --umi

elif [ "$rna_opt" == "atac" ]; then

vartrix_linux -v $vcf -b $bam -f $ref -s coverage --out-variants ${outdir}/variants.tsv --ref-matrix ${outdir}/ref_matrix.mtx --out-matrix ${outdir}/alt_matrix.mtx -c $barcode --threads $nthreads --mapq 10

else

echo "Specify rna or atac" 1>&2

exit 64

fi

cp "${meta}" "${outdir}/variant_meta_data.tsv"

ln -s $(dirname $barcode) ${outdir}/levels

## split_bam_cells.sh

#!/bin/bash

# to run: source path/to/split_bam_cells.sh <path_to_bam> <name_of_output_directory> <path_to_barcodes> <nthreads>

# this script will not generate a list of cells

# the file "split_script3.py" must be located in the same folder as this bash source file

# nthreads refers to the number of threads which will be used during sorting

# requires python3 with pysam (and other dependencies) and samtools

declare -a path_to_bam=$1

declare -a output_dir=$2

declare -a path_to_barcodes=$3

declare -a nthreads=$4

declare -a base_dir="$( cd "$( dirname "${BASH_SOURCE[0]}" )" >/dev/null 2>&1 && pwd )"

echo $base_dir

mkdir ${output_dir}

samtools sort -l 0 -t "CB" -O sam -o ${output_dir}/sorted.sam -@ "${nthreads}" ${path_to_bam}

echo "done sorting"

mkdir ${output_dir}/split_bams

python3 ${base_dir}/split_script4.py -b "${output_dir}/sorted.sam" -o "${output_dir}/split_bams" -c "${path_to_barcodes}"

echo "done splitting"

rm ${output_dir}/sorted.sam

# question: do we need to index?

for inf in ${output_dir}/split_bams/*.bam; do samtools index -b $inf; done

# add a link to the original bam file in the , as well as to the barcode file

echo "done indexing"

# src

## cell_list.py

import os

import numpy as np

import pandas as pd

import multiprocessing

from typing import List

from src_alt.parsed_vcf import Cell

class CellList():

name: str = None

n_cells: int = 0

header: str = None

cells: pd.DataFrame = None

mutations: pd.DataFrame = None

def __init__(self, list_of_cells: List[Cell], name: str):

# TODO add asserts here

self.name = name

self.n_cells = len(list_of_cells)

self.header = list_of_cells[0].head

cell_ids = [c.cell_id for c in list_of_cells]

barcodes = [c.cell_barcode for c in list_of_cells]

mut_per_cell = [c.number_variants for c in list_of_cells]

pass_per_cell = [c.number_pass for c in list_of_cells]

insert_per_cell = [c.number_insertions for c in list_of_cells]

coding_per_cell = [c.number_coding for c in list_of_cells]

# impact_per_cell=[sum((i != 'MODIFIER') & (i != 'non_coding') for i in c.impacts_) for c in list_of_cells]

avg_depth_per_cell = [((sum(c.depths_)/c.number_variants)

if c.number_variants > 0 else 0) for c in list_of_cells]

self.cells = pd.DataFrame.from_dict({'id': cell_ids})

self.cells['barcode'] = barcodes

self.cells['mut_per_cell'] = mut_per_cell

self.cells['pass_per_cell'] = pass_per_cell

self.cells['insert_per_cell'] = insert_per_cell

self.cells['coding_per_cell'] = coding_per_cell

# self.cells['impact_per_cell']=impact_per_cell

self.cells['avg_depth_per_cell'] = avg_depth_per_cell

self.cells.sort_values(by=['id'])

id_tag = [c.cell_ids_ for c in list_of_cells]

chr_tag = [c.chromosomes_ for c in list_of_cells]

pos_tag = [c.positions_ for c in list_of_cells]

gene_tag = [c.gene_ids_ for c in list_of_cells]

allele_tag = [c.alleles_ for c in list_of_cells]

pass_tag = [c.pass_ for c in list_of_cells]

depth_tag = [c.depths_ for c in list_of_cells]

vaf_tag = [c.vafs_ for c in list_of_cells]

label_tag = [c.labels_ for c in list_of_cells]

impact_tag = [c.impacts_ for c in list_of_cells]

multia_tag = [c.multi_a_ for c in list_of_cells]

indel_tag = [c.indels_ for c in list_of_cells]

qual_tag = [c.qualities_ for c in list_of_cells]

t_id_tag = np.hstack(np.array([np.asarray(i)

for i in id_tag], dtype=object))

t_chr_tag = np.hstack(

np.array([np.asarray(i) for i in chr_tag], dtype=object))

t_pos_tag = np.hstack(

np.array([np.asarray(i) for i in pos_tag], dtype=object))

t_gene_tag = np.hstack(

np.array([np.asarray(i) for i in gene_tag], dtype=object))

t_allele_tag = np.hstack(

np.array([np.asarray(i) for i in allele_tag], dtype=object))

t_pass_tag = np.hstack(

np.array([np.asarray(i) for i in pass_tag], dtype=object))

t_depth_tag = np.hstack(

np.array([np.asarray(i) for i in depth_tag], dtype=object))

t_vaf_tag = np.hstack(

np.array([np.asarray(i) for i in vaf_tag], dtype=object))

t_label_tag = np.hstack(

np.array([np.asarray(i) for i in label_tag], dtype=object))

t_impact_tag = np.hstack(

np.array([np.asarray(i) for i in impact_tag], dtype=object))

t_multia_tag = np.hstack(

np.array([np.asarray(i) for i in multia_tag], dtype=object))

t_indel_tag = np.hstack(

np.array([np.asarray(i) for i in indel_tag], dtype=object))

t_qual_tag = np.hstack(

np.array([np.asarray(i) for i in qual_tag], dtype=object))

self.mutations = pd.DataFrame.from_dict({'id': t_id_tag})

self.mutations['chromosome'] = t_chr_tag

self.mutations['position'] = t_pos_tag

self.mutations['gene'] = t_gene_tag

self.mutations['allele'] = t_allele_tag

self.mutations['map'] = self.mutations['chromosome'].astype(

str) + ':' + self.mutations['position'].astype(int).astype(str) + ':' + self.mutations['allele']

self.mutations['pass'] = t_pass_tag.astype(int)

self.mutations['depth'] = t_depth_tag.astype(int)

self.mutations['vaf'] = t_vaf_tag.astype(float)

self.mutations['label'] = t_label_tag

self.mutations['impact'] = t_impact_tag

self.mutations['multi_a'] = t_multia_tag

self.mutations['indel'] = t_indel_tag

self.mutations['quality'] = t_qual_tag.astype(float)

self.mutations.sort_values(by=['id'])

# not yet tracked

# self.allele_depths_ = []

# self.lines_ = []

# self.bads_ = []

def load_from_folder(self, path):

if not os.path.exists(path):

raise Exception(path + " does not exist")

f = open(path + "/header.txt", "r")

lines = f.readlines()

f.close()

self.name = path.split("/")[-1]

self.n_cells = int(lines[0].split(":")[1])

self.header = lines[1:]

self.parsed_mutations = pd.read_csv(

path + "/body.tsv", sep='\t', dtype=str)

print("loaded " + path)

def __init__(self, in_var):

if isinstance(in_var, CellList):

self.from_cell_list(in_var)

elif isinstance(in_var, str):

self.load_from_folder(in_var)

def save_to_folder(self, path):

path_to_folder = path + "/" + self.name

print(path_to_folder)

if not os.path.exists(path_to_folder):

try:

os.mkdir(path_to_folder)

except OSError:

print("Could not create directory from save_to_folder()")

return

header_file_path = path_to_folder + "/header.txt"

f = open(header_file_path, "w")

f.write("n_cells:" + str(self.n_cells) + "\n")

f.write(self.header)

f.close

body_file_path = path_to_folder + "/body.tsv"

self.parsed_mutations.to_csv(body_file_path, sep='\t', index=False)

print("saved " + path_to_folder)

### Bulk Load functions ###

def get_cells(path: str, name: str, nthreads: int = 1) -> CellList:

cells = []

directory_list = open(path)

directories = directory_list.read().splitlines()

directory_list.close()

#directories = directories[:100] # only first 100 lines for testing

if nthreads >= 1:

file_paths = [d + 'annotated.vcf' for d in directories]

path_ind_tuples = zip(file_paths, range(len(file_paths)))

with multiprocessing.Pool(processes=nthreads) as pool:

cells = pool.starmap(Cell, path_ind_tuples)

my_list = CellList(cells, name)

else:

for i, direct in enumerate(directories):

if len(direct) > 1:

direct = direct + 'annotated.vcf'

cells.append(Cell(direct, i))

my_list = CellList(cells, name)

return my_list

def get_cell_lists(path_list: List[str], name_list: List[str], nthreads: int = 1) -> List[CellList]:

if not isinstance(path_list, list):

path_list = [path_list]

if not isinstance(name_list, list):

name_list = [name_list]

assert len(path_list) == len(name_list)

list_cell_list = []

for i, path in enumerate(path_list):

cell_list = get_cells(path, name_list[i], nthreads=nthreads)

list_cell_list.append(cell_list)

print("finished loading " + cell_list.name)

return list_cell_list

## count_ase_reader.py

import pandas as pd

def count_ase_reader(table_path):

counts = pd.read_csv(table_path, sep="\t")

counts['map'] = counts['contig'].astype(str) + ':' + counts['position'].astype(str) + ':' + counts['refAllele'].astype(str) + '->' + counts['altAllele'].astype(str)

counts['allele'] = counts['refAllele'].astype(str) + '->' + counts['altAllele'].astype(str)

counts.rename(columns = {'contig':'chromosome', 'refCount':'ref_count', 'altCount':'alt_count'}, inplace = True)

return counts

## count_vartrix.py

import os

import argparse

import csv

import allel

import numpy as np

import pandas as pd

import warnings

def parse_args():

parser = argparse.ArgumentParser(description='Count vartrix entries.')

parser.add_argument('vartrixdir', help='path to directory containing vartrix files (alt_matrix.mtx, ref_matrix.mtx, variants.tsv)')

parser.add_argument('vcf', help='VCF file corresponding to the vartrix call')

parser.add_argument('out', help='Output file')

args = parser.parse_args()

return args

def count_vartrix(vardir, vcfdir):

variants = os.path.join(vardir, "variants.tsv")

ref_mtx = os.path.join(vardir, "ref_matrix.mtx")

alt_mtx = os.path.join(vardir, "alt_matrix.mtx")

variant_list = []

chromosomes_vartrix = set()

with open(variants) as f:

tsvreader = csv.reader(f)

for row in tsvreader:

variant_name = row[0]

if 'chr' in variant_name:

variant_name = variant_name.split('chr')[1]

variant_list.append(variant_name)

chromosomes_vartrix.add('_'.join(variant_name.split('_')[0:-1]))

cell_list = [set() for _ in range(len(variant_list))]

cells_w_alt_list = [set() for _ in range(len(variant_list))]

ref_list = np.zeros(len(variant_list))

with open(ref_mtx) as f:

for i, line in enumerate(f.readlines()):

if i < 3:

continue

entry = line.split(' ')

ref_list[int(entry[0])-1] = ref_list[int(entry[0])-1] + int(entry[2])

if int(entry[2]) > 0:

cell_list[int(entry[0])-1].add(int(entry[1]))

alt_list = np.zeros(len(variant_list))

with open(alt_mtx) as f:

for i, line in enumerate(f.readlines()):

if i < 3:

continue

entry = line.split(' ')

alt_list[int(entry[0])-1] = alt_list[int(entry[0])-1] + int(entry[2])

if int(entry[2]) > 0:

cell_list[int(entry[0])-1].add(int(entry[1]))

cells_w_alt_list[int(entry[0])-1].add(int(entry[1]))

with warnings.catch_warnings():

warnings.simplefilter("ignore")

gt_variants = allel.vcf_to_dataframe(vcfdir, fields='*', alt_number=1)

chromosomes = list(gt_variants['CHROM'])

# make sure chromosome namings are compatible

for i, chromosome in enumerate(chromosomes):

if 'chr' in chromosome:

chromosome_split = chromosome.split('chr')[1]

chromosomes[i] = chromosome_split

missing_chr = []

for chrom in list(chromosomes_vartrix):

if not chrom in chromosomes:

missing_chr.append(chrom)

if len(missing_chr) > 0:

print("### WARNING: Chromosomes {} not found in vcf file, will ignore".format(missing_chr))

positions = list(gt_variants['POS'])

ref_alleles = list(gt_variants['REF'])

alt_alleles = list(gt_variants['ALT'])

map_ind = {str(chromosome) + '_' + str(int(position)-1):i for i, (chromosome, position) in enumerate(zip(chromosomes, positions))}

entries = []

for variant in variant_list:

try:

index = map_ind[variant]

except KeyError:

continue

loci = str(chromosomes[index]) + ':' + str(positions[index]) + ':' + str(ref_alleles[index]) + '->' + str(alt_alleles[index])

allele = str(ref_alleles[index]) + '->' + str(alt_alleles[index])

entry = {'map':loci, 'chromosome':str(chromosomes[index]), 'position':str(positions[index]), 'allele':allele, 'ref_count':ref_list[index], 'alt_count':alt_list[index], 'cell_count':len(cell_list[index]), 'cells_w_alt_count':len(cells_w_alt_list[index])}

entries.append(entry)

counts = pd.DataFrame(entries)

return counts

def main():

args = parse_args()

vardir = args.vartrixdir

vcfdir = args.vcf

outfile = args.out

counts = count_vartrix(vardir, vcfdir)

counts.to_csv(outfile, sep='\t', index=False)

if __name__ == "__main__":

main()

## filtering.py

import copy

from typing import List

from src_alt.parsed_mutation_list import ParsedMutationList

def filter_mutations(cell_mut_array: List[ParsedMutationList],

cell_filter_: int,

alt_read_filter_: int,

vaf_filter_: float,

depth_filter_: int,

qual_filter_: float,

exonic=False,

splice=False,

max_cell_filter_: int = None,

max_alt_read_filter_: int = None,

limexonic=False

) -> List[ParsedMutationList]:

# TODO move to within parsed mutations list class

if not isinstance(cell_mut_array, list):

cell_mut_array = [cell_mut_array]

cell_mut_array_copy = []

for cell_mut in cell_mut_array:

assert isinstance(cell_mut, ParsedMutationList)

cell_mut_array_copy.append(copy.deepcopy(cell_mut))

cell_parsed_array = []

for cell_mut in cell_mut_array_copy:

cell_parsed_array.append(cell_mut.parsed_mutations)

order = len(cell_parsed_array)

if(exonic):

for i in range(order):

#cell_parsed_array[i] = (cell_parsed_array[i])[((cell_parsed_array[i])['impact'] != 'non_coding') & ((cell_parsed_array[i])['impact'] != 'MODIFIER')]

cell_parsed_array[i] = (cell_parsed_array[i])[((cell_parsed_array[i])['impact'] != 'non_coding') & ((cell_parsed_array[i])['impact'] != 'MODIFIER')]

print(cell_mut_array_copy[i].name + " total: " + str(len(cell_parsed_array[i])))

elif(limexonic):

for i in range(order):

cell_parsed_array[i] = (cell_parsed_array[i])[((cell_parsed_array[i])['impact'] != 'non_coding') & ((cell_parsed_array[i])['label'] != 'upstream_gene_variant') & ((cell_parsed_array[i])['label'] != 'downstream_gene_variant')]

print(cell_mut_array_copy[i].name + " total: " + str(len(cell_parsed_array[i])))

cell_filtered_array = []

for i in range(order):

tmp_fil_1 = (cell_parsed_array[i])[(cell_parsed_array[i])['count'].astype(int) > cell_filter_]

tmp_fil_2 = tmp_fil_1[tmp_fil_1['weighted avg vaf'].astype(float) > vaf_filter_]

tmp_fil_3 = tmp_fil_2[tmp_fil_2['coverage'].astype(int) > depth_filter_]

tmp_fil_4 = tmp_fil_3[tmp_fil_3['quality'].astype(float) > qual_filter_]

tmp_fil_5 = tmp_fil_4[tmp_fil_4['calls'].astype(int) > alt_read_filter_]

if(splice):

tmp_fil_6 = tmp_fil_5

else:

tmp_fil_6 = tmp_fil_5[~(tmp_fil_5['label'].str.contains("splice_acceptor_variant", regex=False) | tmp_fil_5['label'].str.contains("splice_donor_variant", regex=False) | tmp_fil_5['label'].str.contains("splice_region_variant", regex=False) | tmp_fil_5['label'].str.contains("intron_variant", regex=False))]

if(max_cell_filter_):

tmp_fil_7 = tmp_fil_6[tmp_fil_6['count'] <= max_cell_filter_]

else:

tmp_fil_7 = tmp_fil_6

if(max_alt_read_filter_):

tmp_fil_8 = tmp_fil_7[tmp_fil_7['calls'] <= max_alt_read_filter_]

else:

tmp_fil_8 = tmp_fil_7

cell_filtered_array.append(tmp_fil_8)

print(cell_mut_array_copy[i].name + " filtered: " + str(len(cell_filtered_array[i])))

for i, cell_filtered in enumerate(cell_filtered_array):

cell_mut_array_copy[i].parsed_mutations = cell_filtered.reset_index(drop=True)

return cell_mut_array_copy

## mutation_signature.py

import numpy as np

import pandas as pd

import matplotlib.pyplot as plt

# mutation signatures:

# generate a barplot of the number of variants which follow a specific mutation

# signature such as C->T

# -> mutation list is any dataframe containing variants with relevant fields of gene, chromosome, position, impact, label, and allele

# -> outfile is the path to the output location of the boxplot

def mutation_signatures(mutation_list: pd.DataFrame, outfile: str):

# TODO update to use parsed mutation list class

variants = mutation_list[['gene', 'impact', 'label', 'chromosome', 'position', 'allele']]

variants['ref'] = variants['allele'].str.split('-').str[0]

variants['alt'] = variants['allele'].str.split('>').str[1]

signature_indices = ["A", "C", "T", "G"]

titles = []

list = []

for i, ref in enumerate(signature_indices):

for j, alt in enumerate(signature_indices):

if(i==j):

continue

matches = (variants['ref']==ref) & (variants['alt']==alt)

list.append(matches.sum())

titles.append(ref + "->" + alt)

list.append(len(variants)-sum(list))

titles.append("N/A")

figure, axes = plt.subplots(1, 1, figsize=(16,16))

axes.bar(np.arange(len(list)), list)

axes.set_xticks(np.arange(len(list)))

axes.set_xticklabels(titles)

figure.savefig(outfile)

# mutation signatures stranded:

# generate a barplot of the number of variants which follow a specific mutation

# signature such as C->T, but corrected for strand direction

# -> mutation list is any dataframe containing variants with relevant fields of gene, chromosome, position, impact, label, and allele

# -> outfile is the path to the output location of the boxplot

def mutation_signatures_stranded(mutation_list: pd.DataFrame, outfile: str):

# TODO update to use parsed mutation list class

variants = mutation_list[['gene', 'impact', 'label', 'chromosome', 'position', 'allele', 'strand']]

variants['ref'] = variants['allele'].str.split('-').str[0]

variants['alt'] = variants['allele'].str.split('>').str[1]

signature_indices = ["A", "C", "T", "G"]

signature_compliments = {"A":"T", "G":"C", "C":"G", "T":"A"}

classes = ["+", "-", ".", "?"]

titles = []

lists = {}

for h, cla in enumerate(classes):

list = []

for i, ref in enumerate(signature_indices):

for j, alt in enumerate(signature_indices):

if(i==j):

continue

if(cla == "-"):

b1 = signature_compliments[ref]

b2 = signature_compliments[alt]

else:

b1 = ref

b2 = alt

matches = (variants['ref']==b1) & (variants['alt']==b2) & (variants['strand']==cla)

list.append(matches.sum())

if cla == "+":

titles.append(ref + "->" + alt)

list.append(sum(variants['strand']==cla)-sum(list))

lists[cla] = list

if cla == "+":

titles.append("N/A")

df = pd.DataFrame(lists, index=titles)

ax = df.plot(kind='bar', stacked=True, figsize=(10, 6))

ax.set_ylabel('No. Mutations')

plt.legend(title='labels', bbox_to_anchor=(1.0, 1), loc='upper left')

plt.savefig(outfile)

## overlap_mutation_list.py

import numpy as np

import pandas as pd

import matplotlib.pyplot as plt

from typing import List

from src_alt.parsed_mutation_list import ParsedMutationList

class OverlapMutationList():

array = None

names = None

overlap_matrix = None

# TODO fix this, is not actually its own class, it just appends values to a

# list of mutations, so it should be returned as a list of mutations and

# then common variants should be its own class since it has a new structure

def __init__(self, mut_filtered_array: List[ParsedMutationList], unfiltered=None):

names = []

mut_overlap_array = []

overlap_matrix = np.zeros((len(mut_filtered_array), len(mut_filtered_array)))

for filtered_mut in mut_filtered_array:

assert isinstance(filtered_mut, ParsedMutationList)

mut_overlap_array.append(filtered_mut.parsed_mutations)

mut_comp_array = []

if (unfiltered is not None) and (len(unfiltered) == len(mut_filtered_array)):

for unfiltered_mut in unfiltered:

mut_comp_array.append(unfiltered_mut.parsed_mutations)

else:

print("Unfiltered not available: using filtered array for comparisons")

for filtered_mut in mut_filtered_array:

mut_comp_array.append(filtered_mut.parsed_mutations)

order = len(mut_overlap_array)

overlap = []

for i in range(order):

overlap.append([])

for j in [x for x in range(order) if x != i]:

temp = (mut_overlap_array[j])[(mut_overlap_array[j])['map'].isin((mut_comp_array[i])['map'])]

temp = (mut_comp_array[i])[(mut_comp_array[i])['map'].isin((mut_overlap_array[j])['map'])]

print(mut_filtered_array[j].name + " overlap with " + mut_filtered_array[i].name + ": " + str(len(temp)))

overlap_matrix[j,i] = len(temp)

(overlap[i]).append(temp)

for i in range(order):

for j in range(order-1):

(mut_overlap_array[i]) = pd.concat([(mut_overlap_array[i]), (overlap[i])[j]], ignore_index=True)

(mut_overlap_array[i]).drop_duplicates(subset ='map', keep = 'first', ignore_index=True, inplace = True)

(mut_overlap_array[i]).sort_values(by=['map'], ignore_index=True, inplace=True)

print(mut_filtered_array[i].name + " final: " + str(len(mut_overlap_array[i])))

overlap_matrix[i,i] = len(mut_overlap_array[i])

names.append(mut_filtered_array[i].name)

self.array = mut_overlap_array

self.names = names

self.overlap_matrix = overlap_matrix

def get(self, name):

idx = self.names.index(name)

return self.array[idx]

def get_overlap(self, name1, name2):

# NOTE: in this function, order can matter!

idx1 = self.names.index(name1)

idx2 = self.names.index(name2)

return self.overlap_matrix[idx1, idx2]

# TODO add processing functions within the class (such as automatic overlap

# calculation, filtering out variants that appear or dont appear in certain

# datasets, etc.

# and move up to be with other classes

### Essential Processing Functions ###

# common variants:

# calculates the number of datasets for which a particular variant is in common

# among datasets

# -> returns a single dataframe containing variants with their overlap with each

# dataset, as well as a common dataframe which counts the number of datasets

# that have a given variant in common

def common_variants(overlap_list: OverlapMutationList, cell_mut_list: List[ParsedMutationList]) -> pd.DataFrame:

# TODO move inside overap class

list_array = overlap_list.array

order = len(list_array)

common = pd.concat([list_array[0], list_array[1]], ignore_index=True)

for i in range(2,order):

common = pd.concat([common, list_array[i]], ignore_index=True)

common.drop_duplicates(subset ='map', keep = 'first', ignore_index=True, inplace = True)

for i in range(order):

common[cell_mut_list[i].name] = common['map'].isin((list_array[i])['map'])

common['common'] = 0 + common[cell_mut_list[0].name]

for i in range(1, order):

common['common'] = common['common'] + common[cell_mut_list[i].name]

common.set_index('map', inplace=True)

for i in range(order):

common = common.join((list_array[i]).set_index('map')['quality'], rsuffix = '_' + cell_mut_list[i].name)

for i in range(order):

common = common.join((list_array[i]).set_index('map')['incidence'], rsuffix = '_' + cell_mut_list[i].name)

return common.sort_values(by='gene').reset_index()

# redo common:

# recalculates the common column for a dataframe output of common_variants which

# has been modified or filtered to remove particular subsets of variants or datasets

# where the common column is the counts the number of datasets that have a given

# variant in common

def redo_common(common: pd.DataFrame, names: List[str]) -> pd.DataFrame:

# TODO move inside overlap class

order = len(names)

common['common'] = 0 + common[names[0]]

for i in range(1, order):

common['common'] = common['common'] + common[names[i]]

return common

### Helper Functions ###

# rank overlap:

# generate a barplot of the number of variants which are common to a given number of

# datasets

# -> common is an output from common_variants or redo_common

# -> outfile is the path to the output location of the boxplot

def rank_overlap(common: pd.DataFrame, outfile: str):

# TODO move inside overlap class

ranks = common['common'].value_counts(sort=False).sort_index()

print(ranks)

figure, axes = plt.subplots(1, 1, figsize=(16,16))

ranks.plot(kind='bar', ax=axes)

figure.savefig(outfile)

## parsed_mutation_list.py

import os

import pandas as pd

import warnings

from typing import List, Union

from src_alt.cell_list import CellList

class ParsedMutationList():

name = None

header = None

n_cells = None

parsed_mutations = None

def __init__(self, in_var: CellList):

if isinstance(in_var, CellList):

self.from_cell_list(in_var)

elif isinstance(in_var, str):

self.load_from_folder(in_var)

def from_cell_list(self, cell_list: CellList):

df = cell_list.mutations.copy()

df['calls'] = (df.loc[:, 'vaf']*df.loc[:, 'depth']).copy()

# df['pass'] = df['pass'].astype(int)

self.name = cell_list.name

self.header = cell_list.header

self.n_cells = cell_list.n_cells

group = df.groupby(['map'])

self.parsed_mutations = group.count().reset_index(

).sort_values(by=['map'], ascending=True)

self.parsed_mutations.rename(

columns={list(self.parsed_mutations)[1]: 'count'}, inplace=True)

df_chromosome = group['chromosome'].first().reset_index().sort_values(by=[

'map'], ascending=True)

df_position = group['position'].first().reset_index().sort_values(by=[

'map'], ascending=True)

df_pass = group['pass'].mean().reset_index(

).sort_values(by=['map'], ascending=True)

df_depth = group['depth'].mean().reset_index(

).sort_values(by=['map'], ascending=True)

df_coverage = group['depth'].sum().reset_index(

).sort_values(by=['map'], ascending=True)

df_vaf_avg = group['vaf'].mean().reset_index(

).sort_values(by=['map'], ascending=True)

df_calls = group['calls'].sum().reset_index(

).sort_values(by=['map'], ascending=True)

df_gene = group['gene'].first().reset_index(

).sort_values(by=['map'], ascending=True)

df_allele = group['allele'].first().reset_index(

).sort_values(by=['map'], ascending=True)

df_label = group['label'].first().reset_index(

).sort_values(by=['map'], ascending=True)

df_impact = group['impact'].first().reset_index(

).sort_values(by=['map'], ascending=True)

# df_quality = group['quality'].mean().reset_index().sort_values(by=['map'], ascending=True)

# df_quality = group['quality'].median().reset_index().sort_values(by=['map'], ascending=True)

df_quality = group['quality'].max().reset_index(

).sort_values(by=['map'], ascending=True)

self.parsed_mutations['chromosome'] = df_chromosome[list(df_chromosome)[

1]]

self.parsed_mutations['position'] = df_position[list(df_position)[1]]

self.parsed_mutations['gene'] = df_gene[list(df_gene)[1]]

self.parsed_mutations['allele'] = df_allele[list(df_allele)[1]]

self.parsed_mutations['label'] = df_label[list(df_label)[1]]

self.parsed_mutations['impact'] = df_impact[list(df_impact)[1]]

self.parsed_mutations['pass'] = df_pass[list(df_pass)[1]]

self.parsed_mutations['depth'] = df_depth[list(df_depth)[1]]

self.parsed_mutations['coverage'] = df_coverage[list(df_coverage)[1]]

self.parsed_mutations['calls'] = df_calls[list(df_calls)[1]]

self.parsed_mutations['avg vaf'] = df_vaf_avg[list(df_vaf_avg)[1]]

self.parsed_mutations['weighted avg vaf'] = df_calls[list(

df_calls)[1]]/self.parsed_mutations['coverage']

self.parsed_mutations['quality'] = df_quality[list(df_quality)[1]]

self.parsed_mutations['incidence'] = self.parsed_mutations['count']/self.n_cells

self.parsed_mutations.sort_values(

by=['chromosome', 'position'], ascending=True, inplace=True)

self.parsed_mutations.reset_index(drop=True, inplace=True)

def load_from_folder(self, path: str):

if not os.path.exists(path):

raise Exception(path + " does not exist")

f = open(path + "/header.txt", "r")

lines = f.readlines()

f.close()

self.name = path.split("/")[-1]

self.n_cells = int(lines[0].split(":")[1])

self.header = lines[1:]

self.parsed_mutations = pd.read_csv(path + "/body.tsv", sep='\t')

print("loaded " + path)

def save_to_folder(self, path: str):

path_to_folder = path + "/" + self.name

print(path_to_folder)

if not os.path.exists(path_to_folder):

try:

os.mkdir(path_to_folder)

except OSError:

print("Could not create directory from save_to_folder()")

return

header_file_path = path_to_folder + "/header.txt"

f = open(header_file_path, "w")

f.write("n_cells:" + str(self.n_cells) + "\n")

f.write(self.header)

f.close

body_file_path = path_to_folder + "/body.tsv"

self.parsed_mutations.to_csv(body_file_path, sep='\t', index=False)

print("saved " + path_to_folder)

### helper functions ###

def save_mutation_array(cell_mut_array: Union[ParsedMutationList, List[ParsedMutationList]], path_to_folder: str):

if not isinstance(cell_mut_array, list):

cell_mut_array = [cell_mut_array]

if not os.path.exists(path_to_folder):

try:

os.mkdir(path_to_folder)

except OSError:

print("Could not create directory from save_mutations()")

return

for i, mut_array in enumerate(cell_mut_array):

assert isinstance(mut_array, ParsedMutationList)

mut_array.save_to_folder(path_to_folder)

def load_mutation_array(path_to_folder: str, names: str) -> ParsedMutationList:

mutation_array = []

for name in names:

pathname = path_to_folder + "/" + name

if os.path.isdir(pathname):

mutation_array.append(ParsedMutationList(pathname))

else:

raise Exception("Could not find file " + pathname + "\n")

return mutation_array

def get_mutations(list_cell_lists: List[CellList]) -> List[ParsedMutationList]:

if not isinstance(list_cell_lists, list):

list_cell_lists = [list_cell_lists]

cell_parsed_array = []

for i, list_cell in enumerate(list_cell_lists):

assert isinstance(list_cell, CellList)

cell_parsed_raw = ParsedMutationList(list_cell)

cell_parsed_array.append(cell_parsed_raw)

print("finished parsing " + cell_parsed_raw.name)

return cell_parsed_array

# generate vcf:

# Turn a mutation list dataframe into a vcf file

# The mutation list should have unique mutations and 'chromosome', 'position', and 'allele' fields

# as generated by a parsed mutation list 'parsed_mutations' dataframe

# Likewise, the header should be taken from the 'header' contained in a parsed mutation list

def generate_vcf(mutation_list: pd.DataFrame, header: str, file_name: str, atac=False):

# TODO update to use mutation list header

#header = "#CHROM\tPOS\tID\tREF\tALT\tQUAL\tFILTER\tINFO\n"

if len(mutation_list) == 0:

warnings.warn("Skipped {} as dataframe was empty".format(file_name))

return

lines = mutation_list.sort_values(by=['chromosome','position'])['chromosome'].astype(str)

if(atac):

lines = "chr" + lines

lines = lines + "\t" + mutation_list.sort_values(by=['chromosome','position'])['position'].astype(str)

lines = lines + "\t."

lines = lines + "\t" + mutation_list.sort_values(by=['chromosome','position'])['allele'].str.split('-', n = 1, expand = True)[0]

lines = lines + "\t" + mutation_list.sort_values(by=['chromosome','position'])['allele'].str.split('>', n = 1, expand = True)[1]

lines = lines + "\t0"

lines = lines + "\tPASS"

#lines = lines + "\tNA=0\n"

lines = lines + "\t\n"

outfile = open(file_name, "w")

try:

outfile.writelines(header.header)

except:

f = open(header, "r")

header = f.readlines()

f.close()

outfile.writelines(header)

for line in lines:

outfile.write(line)

outfile.close()

## parsed_vcf.py

"""

This file contains the parsed VCF and cell objects which parse a single-cell vcf file (or any single vcf file)

and hold the parsed mutational information for that file, the results of which are used to generate a cell list

"""

import warnings

class ParsedVCF():

number_variants = 0 # number of variants processed

number_pass = 0 # number of variants which pass filters

number_insertions = 0 # number of indel variants

number_coding = 0 # number of variants in a protein-coding region (defined by snpEFF)

pass_ = [] # list of entries for each variant: whether the variant passes filters

indels_ = [] # list of entries for each variant: whether the variant is an indel

multi_a_ = [] # list of entries for each variant: whether the variant is multi-allelic

depths_ = [] # list of entries for each variant: the measured depth as defined by the total reads in the AD field

vafs_ = [] # list of entries for each variant: the allele frequency as defined as "# supporting alleles / depth"

impacts_ = [] # list of entries for each variant: the variant impact as defined by snpEFF

labels_ = [] # list of entries for each variant: the variant label as defined by snpEFF

allele_depths_ = [] # list of entries for each variant: the alt-allele count

chromosomes_ = [] # list of entries for each variant: the chromosome of the variant

positions_ = [] # list of entries for each variant: the position of the variant

gene_ids_ = [] # list of entries for each variant: the variant gene as defined by snpEFF

alleles_ = [] # list of entries for each variant: the unique allele id in format ref->alt

qualities_ = [] # list of entries for each variant: the quality of the called variant

bads_ = [] # list of entries for each variant: whether the variant is unusable for some reason

cell_ids_ = [] # list of entries for each variant: the id of the cell for which the variant was called, used downstream

n_multi = 0 # number of multiallelic variants

head = "" # header of the vcf file

cell_barcode = "" # barcode of the cell

cell_id = 0 # id of the cell

def __init__(self, filename: str):

# TODO solve issues with cell_ids etc. that should only affect cells, not parsed vcfs

variant_file = open(filename)

lines = variant_file.readlines()

variant_file.close()

for line_o in lines:

line = line_o.strip()

if line[0] == '#':

# line is header

self.head = self.head + line_o

if line[1] != '#':

# line is column head

line = line[1:]

line = line.split('\t')

chrom_index = line.index('CHROM')

pos_index = line.index('POS')

filter_index = line.index('FILTER')

info_index = line.index('INFO')

format_index = line.index('FORMAT')

ref_index = line.index('REF')

alt_index = line.index('ALT')

qual_index = line.index('QUAL')

continue

major_cols = line.split('\t')

if len(major_cols) > format_index+2:

raise Exception(

"{} contains more than one sample".format(filename))

alts = major_cols[alt_index]

alts = alts.split(',')

for alt_n in range(len(alts)):

if alts[alt_n] == '*':

# skip the allele as it is spanning and therefore documented elsewhere

continue

# format contains quality and depth stats on the variant

format_header = major_cols[format_index]

format_header = format_header.split(':')

format_body = major_cols[format_index+1]

format_body = format_body.split(':')

try:

# AD is depth for ref and alt alleles

AD_index = format_header.index('AD')

AD = format_body[AD_index]

AD = AD.split(',')

if len(AD) != len(alts)+1: # !!! watch out, this may be incorrect

AD_i = float("NaN")

else:

AD_i = AD[alt_n+1]

self.allele_depths_.append(AD_i)

except ValueError:

# for strelka somatic snps

try:

ref_dp_index = major_cols[ref_index] + 'U'

RD_index = format_header.index(ref_dp_index)

alt_dp_index = alts[alt_n] + 'U'

AD_index = format_header.index(alt_dp_index)

AD_alt = format_body[AD_index].split(',')[0]

AD_ref = format_body[RD_index].split(',')[0]

AD = [AD_ref, AD_alt]

self.allele_depths_.append(AD_alt)

except ValueError:

# for strelka somatic indels

try:

RD_index = format_header.index('TAR')

AD_index = format_header.index('TIR')

AD_alt = format_body[AD_index].split(',')[0]

AD_ref = format_body[RD_index].split(',')[0]

AD = [AD_ref, AD_alt]

self.allele_depths_.append(AD_alt)

except ValueError:

# for samtools (?) or varscan (?)

info_body = major_cols[info_index]

info_body_split = info_body.split(';')

info_body_dict = {i.split('=')[0]: i.split(

'=')[-1] for i in info_body_split}

DP4 = info_body_dict['DP4'].split(',')

AD_alt = int(DP4[2]) + int(DP4[3])

AD_ref = int(DP4[0]) + int(DP4[1])

AD = [AD_ref, AD_alt]

self.allele_depths_.append(AD_alt)

if len(alts) != 2:

self.n_multi = self.n_multi + 1

self.multi_a_.append(True)

else:

self.multi_a_.append(False)

try:

self.qualities_.append(float(major_cols[qual_index]))

except ValueError:

if major_cols[qual_index] == ".":

self.qualities_.append(float(0.0))

else:

raise Exception("bad!")

# self.lines_.append(line_o)

self.number_variants = self.number_variants + 1

chromosome = major_cols[chrom_index]

if 'chr' in chromosome:

chromosome = chromosome.split('chr')[1]

self.chromosomes_.append(chromosome)

self.positions_.append(int(major_cols[pos_index]))

allele = major_cols[ref_index] + '->' + alts[alt_n]

self.alleles_.append(allele)

if major_cols[filter_index] == 'PASS':

self.number_pass = self.number_pass + 1

self.pass_.append(True)

else:

self.pass_.append(False)

# The following uses DP to calculate depth, except that it was realized that AD should work fine for _most_ depth calculations (remember, indels filter out low-quality reads from this count)

# DP_index = None # DP is total depth for variant

# try:

# DP_index = format_header.index('DP')

# except ValueError:

# DPI_index = format_header.index('DPI')

# if DP_index is not None:

# DP = format_body[DP_index]

# else:

# self.number_insertions = self.number_insertions + 1

# DP = format_body[DPI_index]

# self.depths_.append(int(DP))

DPI_index = None

try:

DPI_index = format_header.index('DPI')

except ValueError:

pass

if DPI_index is not None: # not sure if this is best way to check for indels

self.number_insertions = self.number_insertions + 1

self.indels_.append(True)

DPI = format_body[DPI_index]

else:

self.indels_.append(False)

depth = sum([int(i) for i in AD])

if depth == 0:

try:

if int(DPI) != 0:

depth = int(DPI)

self.bads_.append(False)

else:

self.bads_.append(True)

except:

self.bads_.append(True)

else:

self.bads_.append(False)

self.depths_.append(depth)

try:

# this is incorrect, figure out how to deal with multiple alt alleles

VAF = int(AD[1]) / depth

except:

VAF = -1

self.vafs_.append(VAF)

info_body = major_cols[info_index]

info_body = info_body.split(';')

try:

ann = [i for i in info_body if 'ANN=' in i][0]

except:

self.impacts_.append('None')

self.gene_ids_.append('None')

self.labels_.append('None')

warnings.warn(

"Could not find annotation for line:\n{}".format(line_o))

continue

ann = ann.split('=')[1]

ann = ann.split(',')

# the following work fine with the current version of snpEFF,

# but may not work in the future

allele_index = 0 # look at INFO=<ID=ANN...

coding_index = 7 # look at INFO=<ID=ANN...

label_index = 1 # look at INFO=<ID=ANN...

impact_index = 2 # look at INFO=<ID=ANN...

gene_index = 3 # look at INFO=<ID=ANN...

curr_imp_len = len(self.impacts_)

curr_lab_len = len(self.labels_)

curr_gid_len = len(self.gene_ids_)

for ann_i in range(len(ann)):

ann_ = ann[ann_i]

ann_ = ann_.split('|')

if ann_[allele_index] == alts[alt_n]:

if ann_[coding_index] == 'protein_coding':

self.impacts_.append(ann_[impact_index])

self.gene_ids_.append(ann_[gene_index])

self.number_coding = self.number_coding + 1

else:

self.impacts_.append('non_coding')

self.gene_ids_.append('NA')

self.labels_.append(ann_[label_index])

break

# temporary code to double check that offset of appends is not broken in for loop

if not ((len(self.impacts_) == curr_imp_len+1) and (len(self.labels_) == curr_lab_len+1) and (len(self.gene_ids_) == curr_gid_len+1)):

print(f"{len(self.impacts_)} {curr_imp_len+1}")

print(f"{len(self.labels_)} {curr_lab_len+1}")

print(f"{len(self.gene_ids_)} {curr_gid_len+1}")

print(f"{line_o}")

print(f"{alts[alt_n]} {ann_[allele_index]}")

if not (len(self.allele_depths_) == len(self.multi_a_) == len(self.qualities_) == len(self.chromosomes_) == len(self.positions_) == len(self.alleles_) == len(self.pass_) == len(self.indels_) == len(self.bads_) == len(self.depths_) == len(self.vafs_) == len(self.impacts_) == len(self.labels_) == len(self.impacts_) == len(self.labels_) == len(self.gene_ids_) == self.number_variants):

# raise Exception("Error in parse_vcf: list length mismatch during parsing")

warnings.warn(

"Warning in parse_vcf: list length mismatch during parsing")

self.impacts_.append(None)

self.labels_.append(None)

self.gene_ids_.append(None)

self.cell_ids_ = [0 for i in range(self.number_variants)]

class Cell(ParsedVCF):

""" This class is identical to the ParsedVCF except that it contains a unique cell_id and barcode """

def __init__(self, filename: str, cell_id: int):

# TODO add asserts and catches here

super().__init__(filename)

self.cell_barcode = (filename.split("/annotated.vcf")[0]).split("/")[-1]

self.cell_id = cell_id

self.cell_ids_ = [cell_id for i in range(self.number_variants)]

## plot.py

import numpy as np

import seaborn as sns

### Basic Abstraction Functions ###

def axplot(figure, axes_list, in_data_ob, pltfun, gs, figure_ind, title):

axes_list.append(figure.add_subplot(gs[figure_ind])) # may want to automate the index creation process

pltfun(in_data_ob, axes_list[-1])

axes_list[-1].set_title(title)

return len(axes_list)

def axtitle(axes_list, x_title, y_title):

axes_list[-1].set_xlabel(x_title)

axes_list[-1].set_ylabel(y_title)

def violin(data, axes):

sns.violinplot(y=data, color="0.8", ax=axes)

sns.stripplot(y=data, size=1, jitter=True, zorder=1, ax=axes)

def scatter(data, axes):

axes.scatter(data[0], data[1], s=2)

def bar(data, axes):

axes.bar(data[0], data[1])

def hist(data, axes):

axes.hist(data[0], bins=data[1], range=data[2], log=True)

def hist_bin(X):

return np.histogram(X, bins=10, range=(0.0,1.0))

## ptm.py

# filter known PTM sites

#

def filter_known_ptm_sites(mutation_list, ptm_list, isbed=True):

# TODO find some way to do this in terms of the overlap class

variants = mutation_list.copy()

ptms = ptm_list.copy()

print(ptms.head(n=5))

if(('chr' in str(ptms['chromosome'].iloc[0])) & (not 'chr' in str(variants['chromosome'].iloc[0]))):

variants['pmap'] = 'chr' + variants['chromosome'].astype(str) + ':' + variants['position'].astype(int).astype(str)

else:

variants['pmap'] = variants['chromosome'].astype(str) + ':' + variants['position'].astype(int).astype(str)

if(isbed):

ptms['pmap'] = ptms['chromosome'].astype(str) + ':' + (ptms['position']+1).astype(int).astype(str)

else:

ptms['pmap'] = ptms['chromosome'].astype(str) + ':' + ptms['position'].astype(int).astype(str)

print(variants['pmap'].head(n=10))

print(ptms['pmap'].head(n=10))

len1 = variants.shape[0]

removed = variants[variants['pmap'].isin(ptms['pmap'])]

variants = variants[~(variants['pmap'].isin(ptms['pmap']))]

print(removed)

len2 = variants.shape[0]

print('removed ', str(len1-len2), ' known PTM sites')

return variants

## stats.py

import numpy as np

import matplotlib.pyplot as plt

import matplotlib.gridspec as gridspec

from src_alt.plot import axplot, violin, scatter, bar, hist, axtitle

from src_alt.cell_list import CellList

from src_alt.parsed_mutation_list import ParsedMutationList

def cell_stats(cell_list_: CellList, out_name: str):

assert isinstance(cell_list_, CellList)

my_list_mutations = cell_list_.mutations.copy()

my_list_cells = cell_list_.cells.copy()

f = plt.figure(figsize=(16,16))

gs = gridspec.GridSpec(nrows=4, ncols=3, height_ratios=[1, 1, 1, 1])

axes = []

axplot(f, axes, my_list_cells['mut_per_cell'], violin, gs, (0,0), 'Mutations/Cell')

axplot(f, axes, my_list_cells['pass_per_cell'], violin, gs, (0,1), 'Pass Mutations/Cell')

axplot(f, axes, (my_list_cells['mut_per_cell'], my_list_cells['pass_per_cell']), scatter, gs, (0,2), 'Pass vs Total Mutations')

axplot(f, axes, my_list_cells['coding_per_cell'], violin, gs, (1,0), 'Coding Mutations/Cell')

coding_mutations = my_list_mutations[my_list_mutations['impact']!='non_coding'].copy()

impacts, counts = np.unique(coding_mutations['impact'], return_counts=True)

axplot(f, axes, (impacts, counts), bar, gs, (1,1), 'Impact Counts')

my_list_mutations['is_impact'] = (my_list_mutations['impact']!='MODIFIER') & (my_list_mutations['impact']!='non_coding')

my_list_cells['impact_per_cell'] = my_list_mutations.groupby(['id'])['is_impact'].sum().reset_index().sort_values(by=['id'])['is_impact']

axplot(f, axes, my_list_cells['impact_per_cell'], violin, gs, (1,2), 'Non-Modifier Coding Mutations/Cell')

axplot(f, axes, my_list_cells['avg_depth_per_cell'], violin, gs, (2,0), 'Avg Mutation Coverage/Cell')

axplot(f, axes, (my_list_mutations['depth'], 10, (1,10)), hist, gs, (2,1), 'Total Coverage/Mutation')

vafs, counts = np.unique(my_list_mutations['vaf'], return_counts=True)

axplot(f, axes, (vafs, counts), scatter, gs, (2,2), 'VAF Counts/Mutation')

impact_mutations = my_list_mutations[my_list_mutations['is_impact']].copy()

my_list_cells['impact_avg_depth_per_cell'] = impact_mutations.groupby(['id'])['depth'].mean().reset_index().sort_values(by=['id'])['depth']

axplot(f, axes, my_list_cells['impact_avg_depth_per_cell'], violin, gs, (3,0), 'Avg Impactful Mutation Coverage/Cell')

axplot(f, axes, (impact_mutations['depth'], 10, (1,10)), hist, gs, (3,1), 'Total Coverage/Impactful Mutation')

vafs, counts = np.unique(impact_mutations['vaf'], return_counts=True)

axplot(f, axes, (vafs, counts), scatter, gs, (3,2), 'VAF Counts/Impactful Mutation')

plt.show()

f.savefig(out_name)

def variant_stats(mutations: ParsedMutationList, out_name: str):

# NOTE: do not use a mutation list that has been mixed with another (such as after finding overlap between two mutation lists) as this will probably provide inconsistent statistics

variants_list = mutations.copy()

f = plt.figure(figsize=(16,16))

gs = gridspec.GridSpec(nrows=3, ncols=2, height_ratios=[1, 1, 1])

axes = []

axplot(f, axes, (variants_list['count'], 100, (1,100)), hist, gs, (0,0), 'Variant Cell Number')

axtitle(axes, '# cells with variant', 'log histogram count')

axplot(f, axes, (variants_list['depth'], 100, (1,1.1)), hist, gs, (0,1), 'Variant Average Depths')

axtitle(axes, 'average depth per cell of variant (when called)', 'log histogram count')

axplot(f, axes, (variants_list['count'], variants_list['depth']), scatter, gs, (1,0), 'Average Depth vs Number Cells')

axes[-1].set_xlim([0,100])

axes[-1].set_ylim([0,40])

axtitle(axes, '# cells with variant', 'average depth per cell')

axplot(f, axes, (variants_list['coverage'], 100, (1,100)), hist, gs, (1,1), 'Total Variant Site Coverage')

axtitle(axes, '# reads at variant site (ignoring cells in which the variant was not called)', 'log histogram count')

axplot(f, axes, (variants_list['count'],variants_list['coverage']), scatter, gs, (2,0), 'Total Coverage vs Number Cells')

axes[-1].set_xlim([0,100])

axes[-1].set_ylim([0,100])

axtitle(axes, '# cells with variant', 'reads at variant site')

axplot(f, axes, (variants_list['vaf'], 100, (0.0, 1.0)), hist, gs, (2,1), 'Variant overall VAF across Cells')

axtitle(axes, 'vaf for variant', 'log histogram count')

f.savefig(out_name)

## utils.py

import pandas as pd

def to_bed(variants: pd.DataFrame, outfile) -> None:

variant_indices = variants[['gene', 'impact', 'label', 'count', 'new_count', 'quality', 'new_qual', 'chromosome', 'position']]

variant_indices['tail'] = variant_indices['position'] + 1

variant_indices['ref'] = variants['allele'].str.split('-', n = 1, expand = True)[0]

variant_indices['alt'] = variants['allele'].str.split('>', n = 1, expand = True)[1]

variant_indices.to_csv(outfile, sep='\t', index=False)
