# Supplementary material for: Benchmarking bulk and single-cell variant-calling approaches on Chromium scRNA-seq and scATAC-seq libraries
Source: HighWire-hosted journal article supplement (doi:10.1101/gr.277066.122), 2024-08-01
Supplement: Supplemental_Fig_S1.docx [file Supplemental_Fig_S1.docx]

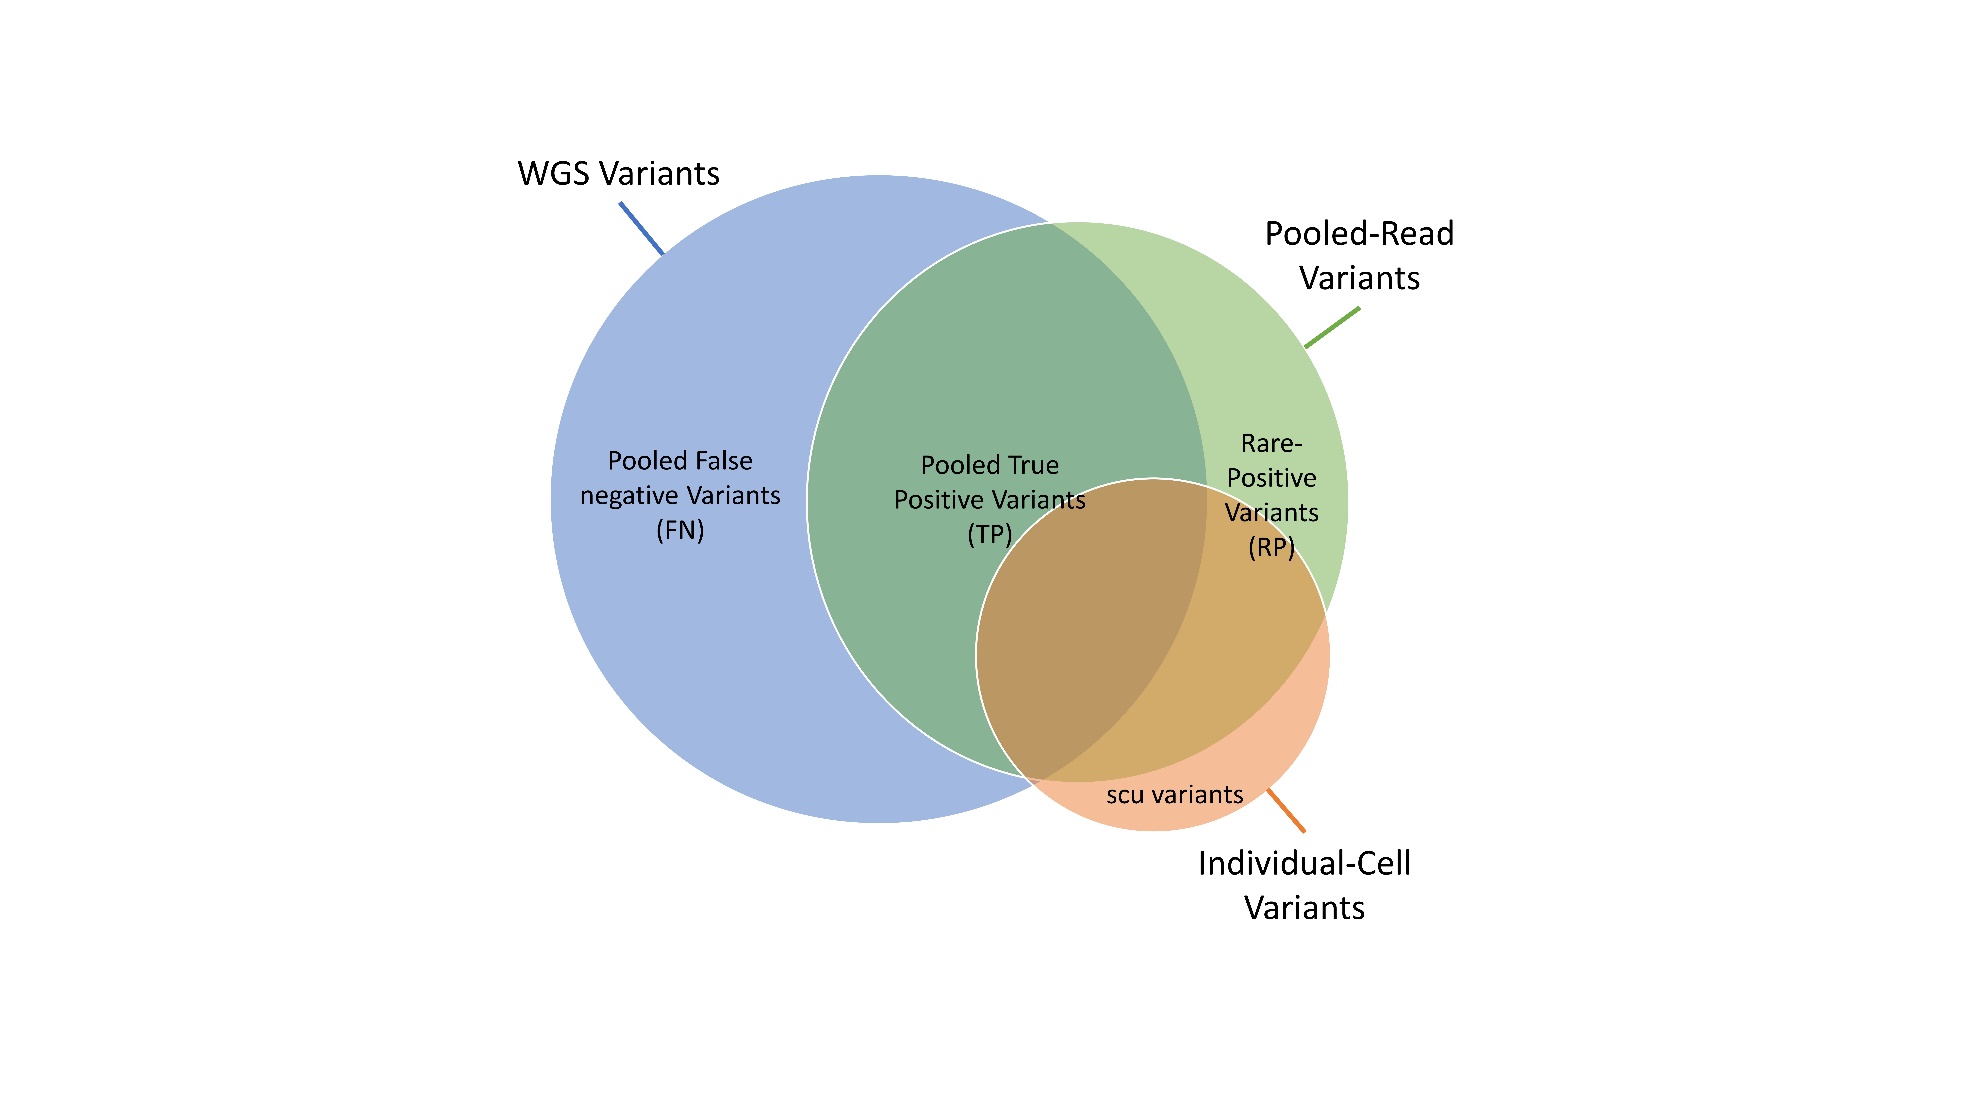


***Supplementary Figure S1:*** Venn diagram visualizing the definition of various variant-category definitions, as defined in table 1. The three circles represent the types of variant calling sources (WGS calling, pooled read calling, and individual-cell calling), with labels in the circles defining types of variant classes.
