# Supplementary material for: Benchmarking bulk and single-cell variant-calling approaches on Chromium scRNA-seq and scATAC-seq libraries
Source: HighWire-hosted journal article supplement (doi:10.1101/gr.277066.122), 2024-08-01
Supplement: Supplemental_Fig_S2.docx [file Supplemental_Fig_S2.docx]

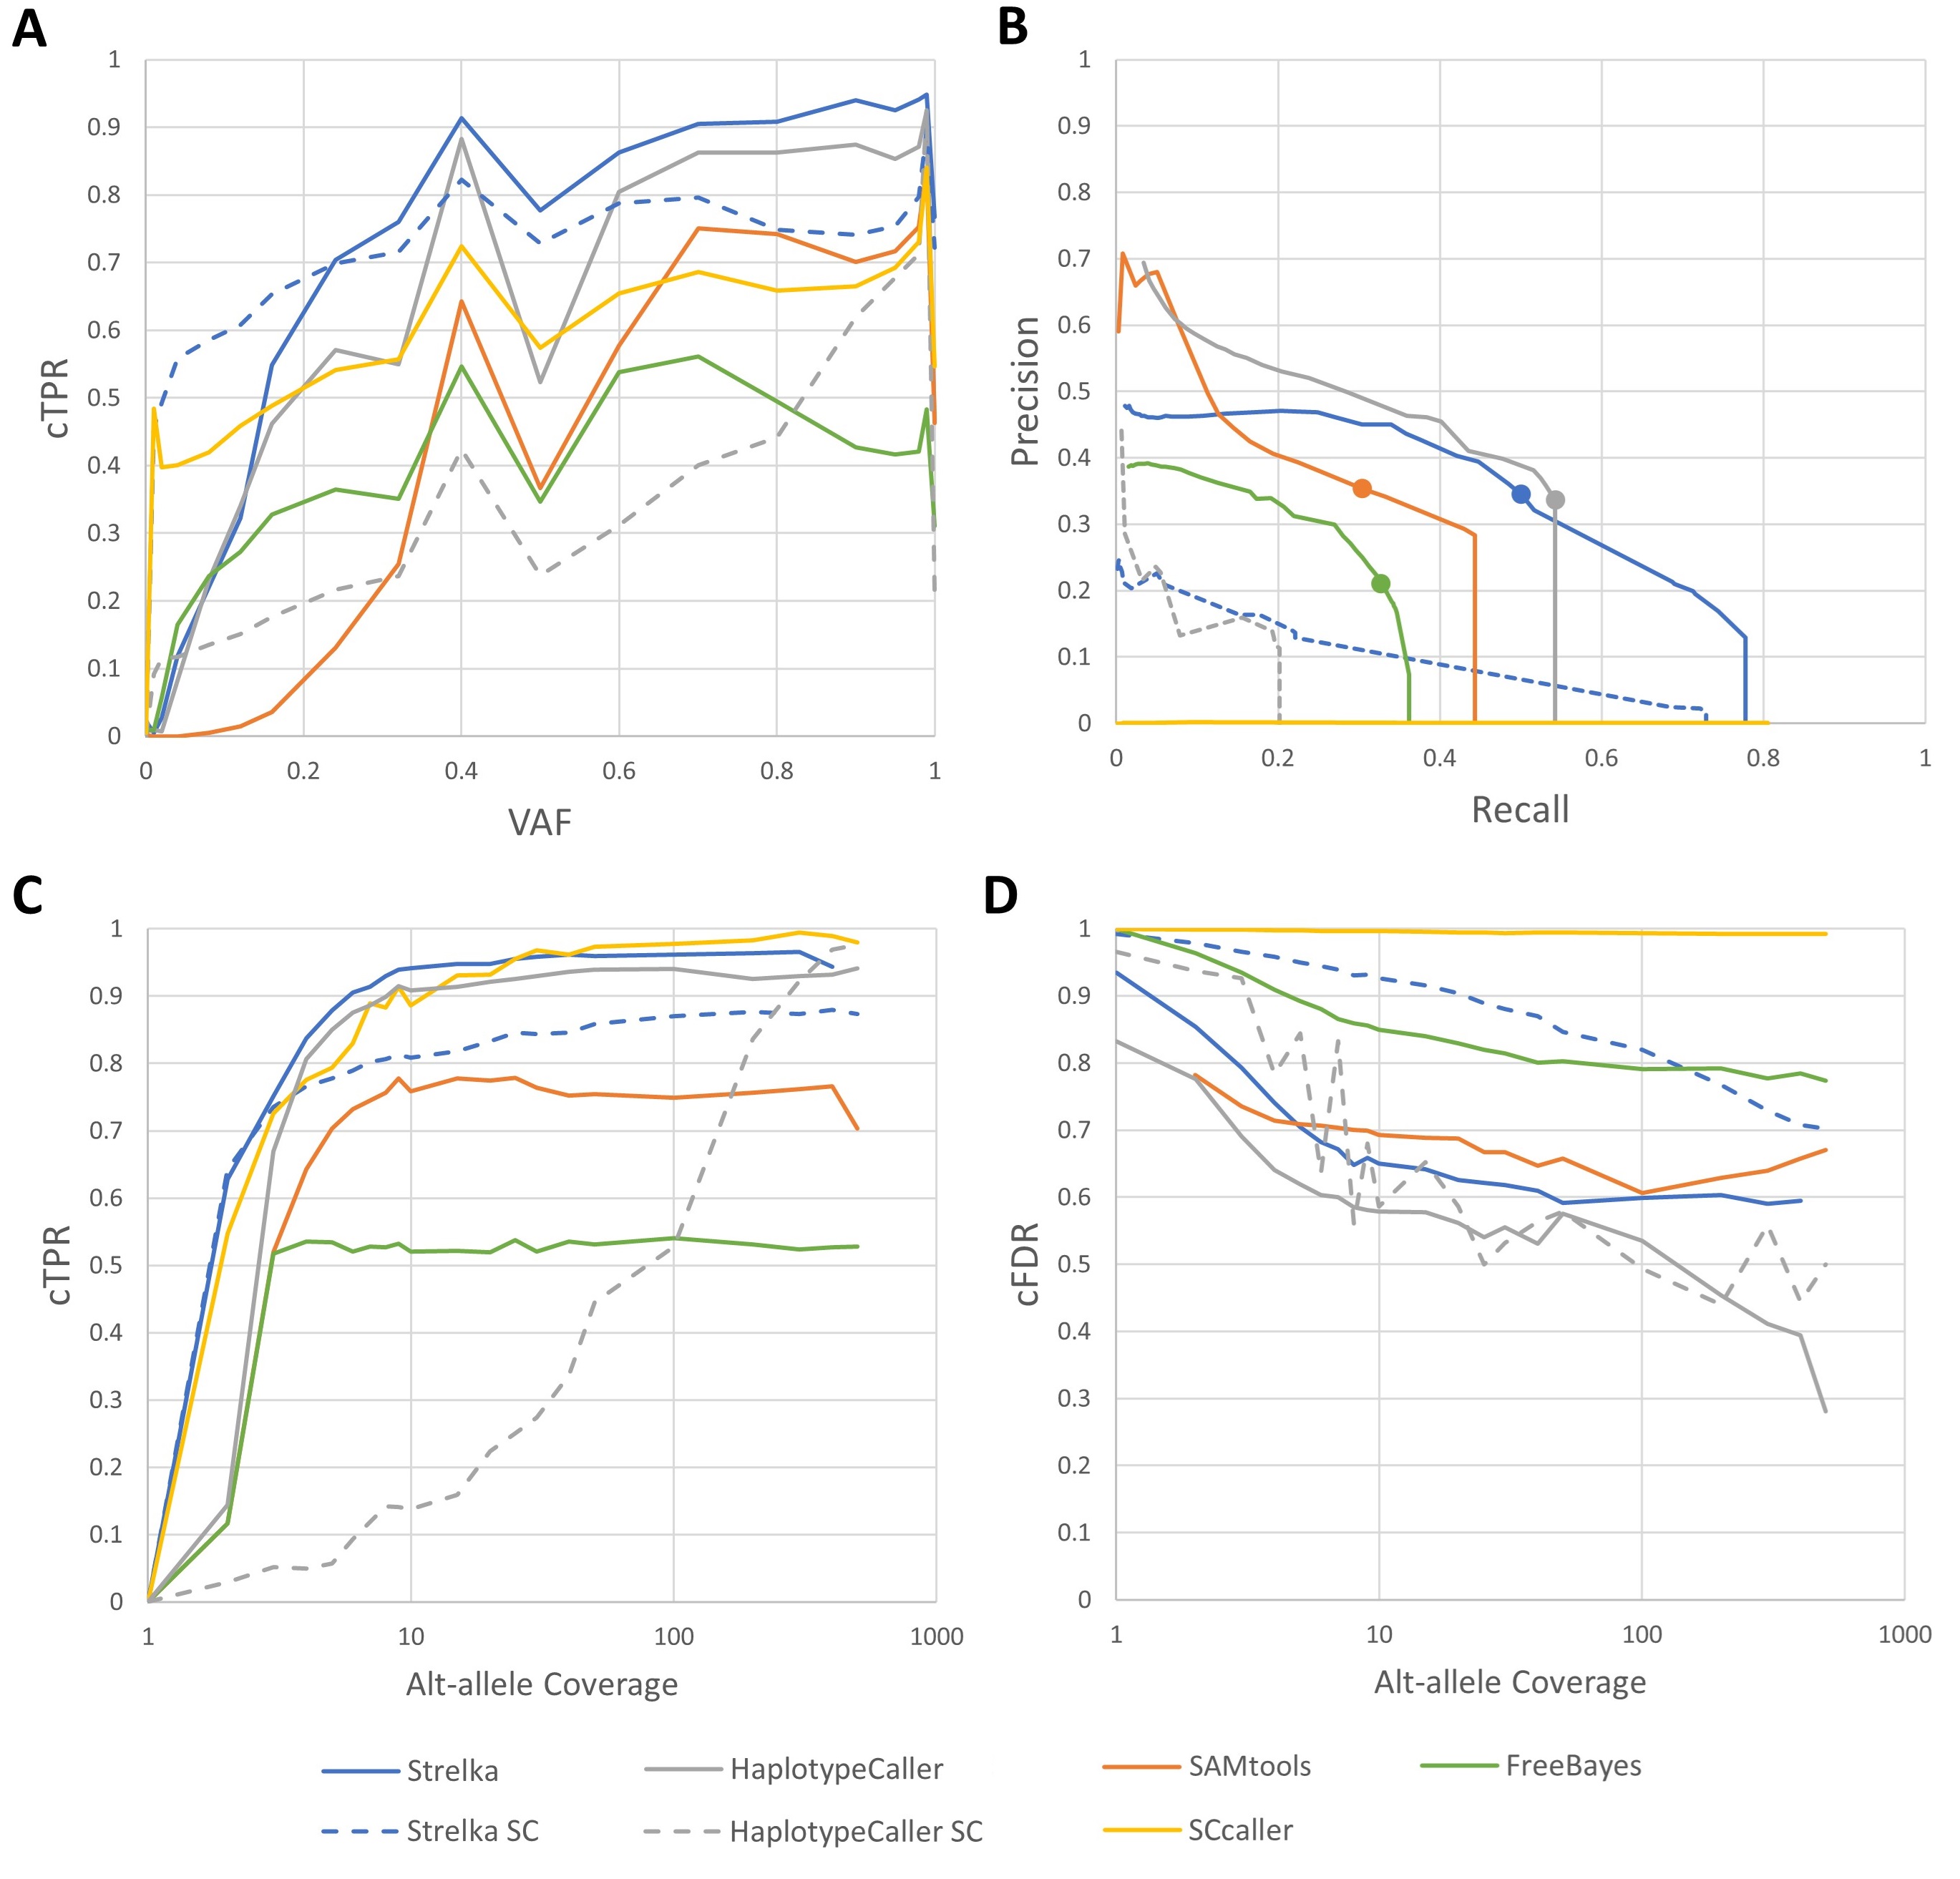


***Supplementary Figure S2:*** Analysis of all scRNA-seq-derived variants (including non-exonic) generated by different variant calling approaches used; (**a**) common true positive rates (cTPR) by variant allele frequency (VAF); (**b**) precision-Recall curves averaged over samples for different variant-calling approaches used;average over samples of common true positive rate (cTPR) (**c**) and common false discovery rate (cFDR) (**d**) versus alternate allele coverage
