# Supplementary material for: Benchmarking bulk and single-cell variant-calling approaches on Chromium scRNA-seq and scATAC-seq libraries
Source: HighWire-hosted journal article supplement (doi:10.1101/gr.277066.122), 2024-08-01
Supplement: Supplemental_Table_S1.docx [file Supplemental_Table_S1.docx]

| **scRNA-seq** | Estimated Number of Cells | Mean Reads per Cell |  |  |
| --- | --- | --- | --- | --- |
| EPSRC1 | 7,729 | 60,493 |  |  |
| EPSRC2 | 7,894 | 50,147 |  |  |
| EPSRC4 | 7,251 | 76,069 |  |  |
| CTRL | 9,270 | 42,922 |  |  |
| **scATAC-seq** | Estimated Number of Cells | Median Fragments per Cell | Fraction Fragments Overlapping Peaks | Fraction Fragments Overlapping TSS |
| EPSRC1 | 11,629 | 13,017 | 47.4% | 31.3% |
| EPSRC2 | 12,032 | 4,599 | 46.9% | 31.0% |
| EPSRC4 | 16,941 | 8,307 | 48.30% | 33.50% |
| CTRL | 9,755 | 21,669 | 67.90% | 29.90% |
| **WGS** | Total Reads | Estimated Average Coverage |  |  |
| EPSRC1 | 1,030,538,974 | 41.87 |  |  |
| EPSRC2 | 783,498,902 | 32.65 |  |  |
| EPSRC4 | 520,835,166 | 22.38 |  |  |

***Supplementary Table S1:*** Sequencing information for three sarcoma samples (EPSRC1, EPSRC2, EPSRC4) and wild type control sample (CTRL1) summarizing modalities for which each sample was processed
